# 1 Integrative Clinical and Molecular Characterization of Translocation Renal Cell 2 Carcinoma

3 Ziad Bakouny<sup>1,2,3</sup>, Ananthan Sadagopan<sup>1</sup>, Praful Ravi<sup>1</sup>, Nebiyou Y. Metaferia<sup>1</sup>, Jiao Li<sup>1</sup>, Shatha  
4 AbuHammad<sup>1</sup>, Stephen Tang<sup>1</sup>, Thomas Denize<sup>3,4</sup>, Emma R. Garner<sup>1</sup>, Xin Gao<sup>3,5</sup>, David A.  
5 Braun<sup>1,2,3</sup>, Laure Hirsch<sup>1,3</sup>, John A. Steinharter<sup>1</sup>, Gabrielle Bouchard<sup>1</sup>, Emily Walton<sup>4</sup>, Destiny  
6 West<sup>4</sup>, Chris Labaki<sup>1</sup>, Shaan Dudani<sup>6</sup>, Chun-Loo Gan<sup>7</sup>, Vidyalakshmi Sethunath<sup>1</sup>, Filipe LF.  
7 Carvalho<sup>8</sup>, Alma Imamovic<sup>1</sup>, Cora Ricker<sup>1</sup>, Natalie I. Vokes<sup>9</sup>, Jackson Nyman<sup>1</sup>, Jihye Park<sup>1</sup>,  
8 Michelle S. Hirsch<sup>3,4</sup>, Rizwan Haq<sup>1</sup>, Gwo-Shu Mary Lee<sup>1</sup>, Bradley A. McGregor<sup>1</sup>, Steven L. Chang<sup>8</sup>,  
9 Adam S. Feldman<sup>10</sup>, Catherine J. Wu<sup>1,2,11</sup>, David F. McDermott<sup>12</sup>, Daniel Y.C. Heng<sup>7</sup>, Sabina  
10 Signoretti<sup>4,13</sup>, Eliezer M. Van Allen<sup>1,2,3\*</sup>, Toni K. Choueiri<sup>1,3,11\*#</sup>, Srinivas R. Viswanathan<sup>1,2,3\*#</sup>

11 \*Senior authors

12 #Corresponding authors

## 13 Affiliations:

- 14 1) Department of Medical Oncology, Dana-Farber Cancer Institute, Boston, MA, USA
- 15 2) Broad Institute of MIT and Harvard, Cambridge, MA, USA
- 16 3) Harvard Medical School, Boston, MA, USA
- 17 4) Department of Pathology, Brigham and Women's Hospital, Boston, MA, USA
- 18 5) Department of Medicine, Massachusetts General Hospital Cancer Center, Boston, MA,  
19 USA
- 20 6) Division of Medical Oncology/Hematology, William Osler Health System, Brampton, ON,  
21 Canada
- 22 7) Division of Medical Oncology, Tom Baker Cancer Centre, University of Calgary, AB,  
23 Canada
- 24 8) Division of Urology, Brigham and Women's Hospital, Boston, MA, USA
- 25 9) Department of Thoracic/Head and Neck Medical Oncology; Department of Genomic  
26 Medicine, MD Anderson Cancer Center, Houston, TX, USA
- 27 10) Department of Urology, Massachusetts General Hospital, Boston, MA, USA
- 28 11) Department of Medicine, Brigham and Women's Hospital, Boston, MA, USA
- 29 12) Beth Israel Deaconess Medical Center, Boston, MA, USA
- 30 13) Department of Oncologic Pathology, Dana-Farber Cancer Institute, Boston, MA, USA

31

## 32 Corresponding authors:

33 **Toni K. Choueiri, MD**, Department of Medical Oncology, Dana-Farber Cancer Institute, 450  
34 Brookline Ave, Boston, Massachusetts, 02215 (toni\_choueiri@dfci.harvard.edu). Tel: +1 617-632-  
35 5456

36 **Srinivas R. Viswanathan, MD, PhD**, Department of Medical Oncology, Dana-Farber Cancer  
37 Institute, 450 Brookline Ave, Boston, Massachusetts, 02215  
38 (srinivas.viswanathan@dfci.harvard.edu). Tel: +1 617-632-2429

39

40 **Abstract:** 150 words

41 **Main text:** 4,439 words

42 **Methods:** 4,067 words

43 **Figures:** 6

44 **Supplementary figures:** 6

45 **Supplementary tables:** 6

46 **ABSTRACT**

47 Translocation renal cell carcinoma (tRCC) is an aggressive and poorly-characterized subtype of  
48 kidney cancer driven by *MiT/TFE* gene fusions. Here, we define the landmarks of tRCC through an  
49 integrative analysis of 152 tRCC patients identified across multiple genomic, clinical trial, and  
50 retrospective cohorts. Most tRCCs harbor few somatic alterations apart from *MiT/TFE* fusions and  
51 homozygous deletions at chromosome 9p21.3 (19.2% of cases). Transcriptionally, tRCCs display a  
52 heightened NRF2-driven antioxidant response that is associated with resistance to many targeted  
53 therapies. Consistently, we find that outcomes for tRCC patients treated with vascular endothelial  
54 growth factor receptor inhibitors (VEGFR-TKI) are worse than those treated with immune checkpoint  
55 inhibition (ICI). Multiparametric immunofluorescence confirmed the presence of CD8<sup>+</sup> tumor-  
56 infiltrating T cells compatible with a clinical benefit from ICI and revealed an exhaustion  
57 immunophenotype distinct from clear cell RCC. Our findings comprehensively define the clinical and  
58 molecular features of tRCC and may inspire new therapeutic hypotheses.

59

60 **KEYWORDS**

61 Translocation renal cell carcinoma; genomics; TFE3; TFEB; MITF; NRF2; VEGFR; immune  
62 checkpoint inhibition; immunotherapy; oxidative stress

63

64

## 65 INTRODUCTION

66 Translocation renal cell carcinoma (tRCC) is an aggressive subtype of non-clear cell kidney cancer that  
67 comprises up to 5% of all RCCs in adults and up to 50% of RCCs in children<sup>1,2</sup>. Prior case series have  
68 suggested that tRCC has a demographic profile that is distinct from more common subtypes of kidney  
69 cancer, with a younger age at diagnosis, advanced stage at presentation, and a female predominance<sup>3-</sup>  
70 <sup>5</sup>. Biologically, tRCCs are driven by activating gene fusions involving transcription factors in the *Mit/TFE*  
71 gene family<sup>6-12</sup>. There are currently no molecularly-targeted therapies specific to tRCC and effective  
72 treatments for this aggressive cancer remain a major unmet medical need.

73 A significant barrier to the development of mechanism-inspired therapeutics for tRCC is an incomplete  
74 understanding of the molecular landscape and clinical features of the disease. Owing to the rarity of  
75 tRCC, prior genomic profiling studies have been limited in scope. While *Mit/TFE* fusions are universal in  
76 tRCC, it remains unclear whether there are co-occurring genetic alterations or transcriptional programs  
77 that represent additional defining features of the disease<sup>13-15</sup>. Like the molecular landscape, the clinical  
78 treatment landscape in tRCC is also largely undefined, with no established standard of care. As a result,  
79 tRCC patients are typically treated with therapies originally developed for clear cell RCC (ccRCC)<sup>16</sup>,  
80 including vascular endothelial growth factor receptor inhibitors (VEGFR-TKI), multikinase inhibitors  
81 (cabozantinib), mTOR inhibitors, or immune checkpoint inhibitors (ICIs). Although some responses to  
82 each of these classes of agents have been reported in tRCC, outcomes have been variable between  
83 series, and it remains unclear which class(es) of therapeutics are best suited to the biology of tRCC<sup>17-23</sup>.

84 An intriguing feature of tRCC is that it can exhibit diverse histologic features that may mimic almost all  
85 other subtypes of RCC<sup>24,25</sup>. As a result, tRCC cases have been retrospectively identified within ccRCC  
86 and papillary RCC (pRCC) sequencing cohorts<sup>7,26,27</sup>. In this study, we leveraged this “histologic overlap”  
87 between tRCC and other RCC subtypes to identify tRCC cases from across multiple genomic, clinical  
88 trial, and retrospective datasets. We combined these cases with profiling of prospectively identified  
89 patients with tRCC to comprehensively characterize the molecular landscape, clinical features, and  
90 treatment outcomes for this disease.

## 91 RESULTS

### 92 Identification of tRCC Cases in Large-scale Clinical and Genomic Datasets

93 To comprehensively characterize both the molecular and clinical features of tRCC, we interrogated RCC  
94 cases across multiple large-scale datasets. In a retrospective analysis of metastatic RCC patients from  
95 the Dana-Farber/Harvard Cancer Center (Harvard cohort), we identified 734 patients with ccRCC, 97  
96 patients with pRCC, 23 patients with chromophobe RCC (chRCC), and 19 patients with tRCC. tRCC  
97 patients were identified on the basis of positive *TFE3* fluorescence *in situ* hybridization (FISH) or strongly  
98 positive TFE3 immunohistochemistry with FISH not available. Among this cohort, we observed that tRCC  
99 patients had significantly worse outcomes than did patients with the other major histologies of RCC (**Fig.**  
100 **1a**), a trend that held in an independent metastatic RCC dataset (International Metastatic RCC Database  
101 Consortium, IMDC; **Fig. S1a**). Similarly, patients with localized tRCC trended towards the shortest  
102 progression-free interval after nephrectomy (**Fig. 1a**). Consistent with smaller case series<sup>3,5</sup>, we used  
103 data from three large independent cohorts (Harvard, IMDC, TCGA) to confirm that tRCCs are female-  
104 predominant (**Fig S1b**), present at a younger age (**Fig S1c**), higher stage (**Fig S1d**), and are associated  
105 with worse clinical prognostic groups in metastatic disease (**Fig S1e**) as compared with the other major  
106 histologies of RCC. Collectively, these data establish tRCC as a disease that predominantly impacts  
107 young female patients and is more aggressive than other forms of RCC in both the localized and  
108 metastatic settings.

109 To aggregate tRCC cases for genomic analysis, we leveraged the fact that tRCCs have been reported  
110 to share overlapping histologic features with the most frequent histologic subtypes of kidney cancer  
111 (ccRCC and pRCC)<sup>28</sup>. As a result, a small number of tRCC cases – harboring defining *Mit/TFE* fusions  
112 – have been inadvertently included in several RCC genomic datasets<sup>26,29–32</sup>. As an example, tRCC cases  
113 with histopathologic features indistinguishable from ccRCC and pRCC were included in the Cancer  
114 Genome Atlas (TCGA) effort<sup>26,29</sup> (**Fig. 1b** and **Supplementary Table 1**). Building on this observation, we  
115 interrogated fusion calls and/or FISH results for 2818 RCCs across 9 independent datasets profiled by  
116 DNA sequencing (exome, genome, or panel sequencing) and/or RNA sequencing (**Fig. 1c**). We identified

117 a total of 90 tRCCs with genomic (DNA) or transcriptomic (RNA) profiling data (42 with only genomic  
118 data, 16 with only transcriptomic data, 32 with both, **Fig. S1f**).

### 119 **Somatic Mutational and Copy Number Alterations in tRCC**

120 We analyzed the 74 tRCC cases on which DNA profiling data were available to elucidate the genomic  
121 landscape of tRCC. Among these cases, 36 were profiled via WES, 3 via WGS, and 35 via panel  
122 sequencing (**Methods**). tRCC cases showed few mutations overall, with a median (interquartile range)  
123 tumor mutational burden of 0.82 (0.43 - 1.28) per megabase (on WES), a rate significantly lower than  
124 ccRCC and pRCC and comparable to chRCC (**Fig. S2a**), with similar trends for all (**Fig. S2b**) and  
125 frameshift (**Fig. S2c**) indels. Of the most frequently mutated genes in tRCC, none exceeded a frequency  
126 of 10% (**Fig. 2a**). These included genes involved in the DNA Damage response (*ATM* (8.1%), *BRCA2*  
127 (8.1%), and *WRN* (4.4%)), genes involved in ATP-dependent chromatin remodeling via the  
128 SWItch/Sucrose Non-Fermentable (SWI/SNF) complex (*ARID1A* (5.4%), *SMARCA4* (5.4%)), and  
129 mutations in *TERT* (6.8%; primarily non-coding mutations in the *TERT* promoter)<sup>33</sup>. Among the 52 cases  
130 with gene-level copy number profiling data available, the only recurrent focal alteration in tRCC was  
131 homozygous deletion at the *CDKN2A/2B* locus (9p21.3), found in 19.2% of cases. Notably, 50.0% (37/74)  
132 of cases in our cohort showed no detectable somatic alterations in either the most frequently mutated  
133 tRCC genes or genes that are significantly mutated in clear cell, papillary, or chromophobe RCC (**Fig.**  
134 **2a**)<sup>27</sup>. Analysis of arm-level copy number alterations among 17 tRCC cases in the TCGA cohort<sup>34</sup>  
135 revealed the most frequent alterations to be hemizygous loss of chromosome 3p (28.6%; though  
136 markedly less frequent versus ccRCC 86.8%;  $p < 0.001$ ), chromosome 9p (23.5%), chromosome 18  
137 (29.4%), and chromosome 22q (18.8%), as well as gain of 17q (20.0%) (**Fig. S2e**). Several of these  
138 alterations are defining features of other tumor types of neural/neuroendocrine origin, including  
139 monosomy 18 in small intestinal neuroendocrine tumors<sup>35</sup>, 17q gain in neuroblastoma<sup>36</sup>, and 22q loss in  
140 pediatric ependymoma<sup>37</sup>.

141 We next conducted an enrichment analysis of driver gene alteration frequencies between tRCC and other  
142 RCC subtypes. We computed pairwise enrichment (tRCC versus ccRCC, pRCC, and chRCC separately)

143 for each locus within each dataset, then used a random-effects meta-analysis to obtain a pooled estimate  
144 of gene alteration enrichment or depletion in tRCC versus comparator RCC histologies across datasets  
145 (see **Methods**). We found that the genes most frequently altered in tRCC – most notably *CDKN2A/2B*  
146 locus (9p21.3) deletions – are highly enriched in tRCC versus other RCC histologies. In contrast,  
147 mutations in genes that are significantly mutated in ccRCC, pRCC, and chRCC tended to be depleted in  
148 tRCC (**Fig. 2b**). Thus, while tRCCs are genomically quiet overall (with a lower mutational and copy  
149 number alteration burden than other RCC histologies), a subset harbor recurrent alterations -- distinct in  
150 profile from those seen in other RCCs -- that may cooperate with the *Mit/TFE* fusion to drive cancer.

### 151 **Structure of *Mit/TFE* fusions in tRCC**

152 We next turned our attention to further analysis of the *Mit/TFE* fusion, the defining genetic lesion in tRCC.  
153 Across the combined tRCC cohort, we found that the vast majority of cases (78 cases; 88.6%) harbored  
154 *TFE3* fusions, while the remainder harbored *TFEB* (8 cases; 9.1%) or *MITF* (2 cases; 2.3%) fusions (**Fig.**  
155 **3a**). Seventeen different *Mit/TFE* fusion partners were observed across the cohort and the spectrum of  
156 fusion partners was largely distinct between *TFE3*, *TFEB*, and *MITF* (**Fig. S3a**). The most common *TFE3*  
157 fusion partners were *ASPSR1*, *SFPQ*, *PRCC*, and *NONO*. Interestingly several chromosomes harbored  
158 multiple potential *Mit/TFE* fusion partners (chr1, chr17, chrX) (**Fig. 3b**). *Mit/TFE* fusion partners showed  
159 an enrichment for ontology terms involving RNA processing and RNA splicing, and this was driven  
160 predominantly by *TFE3* fusion partners (**Fig. 3c** and **Fig. S3b-c**). Analysis of fusion breakpoints revealed  
161 that all fusions preserved the C-terminal helix-loop-helix/leucine zipper domain (HLH-LZ) of the *Mit/TFE*  
162 transcription factor, the region of the protein critical for dimerization and DNA binding<sup>38</sup>; the activation  
163 domain was variably preserved in the fusion product (**Fig. 3d** and **Supplementary Table 2**). Interestingly,  
164 large N-terminal portions of most *TFE3* fusion partners were included in the fusion, including, domains  
165 with RNA-binding potential in cases where the fusion partner was an RNA binding protein. In contrast,  
166 *TFEB* and *MITF* fusion partners tended to preserve less of the N-terminal fusion partner in the fusion  
167 product (**Fig. 3e**). Overall, our results point to a coherent logic to the structure of *Mit/TFE* fusions despite  
168 great diversity in fusion partners and breakpoints.

## 169 **Distinctive transcriptional features of tRCC**

170 Given our observation that most tRCCs harbor few genomic alterations aside from the *MIT/TFE* fusion,  
171 we next sought to determine whether the transcriptional program of tRCC is largely driven by the fusion.  
172 We ectopically expressed either wild type (WT) *TFE3* or four of the most common *TFE3* fusions  
173 (*ASPSR1-TFE3*, *NONO-TFE3*, *PRCC-TFE3*, *SFPQ-TFE3*) in 293T cells and performed RNA-Seq (**Fig.**  
174 **4a** and **Supplementary Table 3**). We derived a 139-gene transcriptional signature based on genes  
175 differentially expressed upon *TFE3* fusion, but not WT *TFE3*, expression (**Fig. S4a, Supplementary**  
176 **Table 4** and **Methods**). Subsequently, we performed unsupervised hierarchical clustering using this  
177 fusion-specific signature. We observed that tRCC samples clustered tightly together across four  
178 independent datasets<sup>30,39-41</sup> (**Fig. 4b** and **Fig. S4b**). Clustering based on our fusion-derived signature  
179 resulted in superior grouping of tRCCs than did clustering based on the 1000 most variable genes in  
180 each dataset (**Fig. S4c**). We then performed differential expression analysis to identify a consensus set  
181 of genes overexpressed in tRCC as compared with all comparator tumor types. In each dataset, we  
182 performed pairwise comparisons between tRCC and each comparator tumor type to identify genes  
183 selectively overexpressed in tRCC (q-value <0.05; **Fig. S4d-e**). We identified a consensus list of 76 genes  
184 that were selectively overexpressed in tRCC (q-value <0.05) in 9/13 or more pairwise comparisons (**Fig.**  
185 **4c** and **Fig. S4e**). Notably, several of these have been previously annotated as MITF target genes<sup>42,43</sup> on  
186 the basis of prior ChIP-Seq studies and include genes involved in neuronal development (*SNCB*,  
187 *TRIM67*, *IRX6*)<sup>44-46</sup>, ion flux and the antioxidant stress response (*SQSTM1*, *TMEM64*, *SLC39A1*)<sup>46-48</sup>,  
188 and lysosomal function/mTORC1 signaling (*RAB7A*, *RHEB*, *RRAGC*, *ATP6V1C1*)<sup>49-51</sup>. We performed  
189 gene set enrichment analysis (GSEA)<sup>52</sup> using hallmark gene sets<sup>53</sup> to identify pathways selectively  
190 activated in tRCC. This revealed a strong enrichment for gene sets pertaining to reactive oxidative  
191 species (ROS) sensing and the response to oxidative stress and xenobiotics (top tRCC-enriched gene  
192 sets shown in **Fig. 4d**). In sum, the transcriptional program of tRCC appeared to be driven by the MIT/TFE  
193 fusion and resulted in overexpression of genes implicated in mTORC1 signaling, antioxidant stress  
194 response, ROS sensing, and the response to oxidative stress and xenobiotics.



## 195 **An antioxidant response signature associated with resistance to targeted therapies in tRCC**

196 The transcription factor NRF2 (nuclear factor erythroid-derived-2-like 2, *NFE2L2*) is a master regulator of  
197 the cellular antioxidant response and controls the expression of genes involved in the response to  
198 xenobiotics and oxidative stress<sup>54</sup>. Notably, activation of the NRF2 pathway has been reported in certain  
199 subsets of RCC via diverse mechanisms that include somatic alteration or hypermethylation of NRF2  
200 pathway members<sup>55</sup> and the production of oncometabolites that modify and inhibit KEAP1, a negative  
201 regulator of NRF2<sup>7,10,27</sup>. Given evidence of activated ROS-sensing in tRCC (**Fig. 4c-d**), we derived an  
202 NRF2 activity score using single sample GSEA (ssGSEA)<sup>56</sup> (based on a 55-gene NRF2 signature<sup>57</sup>)  
203 across all RCC samples with available transcriptome profiling data (46 total tRCC samples across 4  
204 datasets; NRF2 activity calculated and Z-scored separately within each individual dataset). We observed  
205 that NRF2 activity was universally high amongst tRCC samples as compared with other RCC types and  
206 normal kidney tissue (**Fig. 5a**).

207 We next investigated whether high NRF2 activity in tRCC was attributable to somatic alterations in this  
208 pathway. We observed that somatic alterations in the NRF2 pathway (most commonly *KEAP1* or *NFE2L2*  
209 alteration) were associated with an increased NRF2 activity score in ccRCC and pRCC, as was a CpG  
210 island methylator phenotype (CIMP), consistent with prior reports (**Fig. 5b** and **Fig. S5a**)<sup>27</sup>. Interestingly,  
211 however, tRCC samples showed uniformly elevated NRF2 activity, comparable to ccRCC/pRCC samples  
212 with somatic alterations in the NRF2 pathway (**Fig. 5b**), despite having no detectable NRF2 pathway  
213 alterations. The expression of strong oncogenes has been linked to NRF2 pathway activation<sup>58</sup> and our  
214 transcriptomic analyses revealed overlapping targets between NRF2 and MITF (**Fig. 4c**, hypergeometric  
215 one-tailed  $p$ -value < 0.001). Consistently, we observed that the NRF2 gene signature was enriched upon  
216 ectopic expression of all *TFE3* fusions in 293T cells as compared to the mock treatment condition,  
217 suggesting that expression of the *TFE3* fusion may be directly linked to activation of the NRF2 pathway  
218 (**Fig. 5c**).

219 Activation of the NRF2 pathway has been associated with resistance to a number of ROS-producing  
220 drugs, including inducers of ferroptosis, a regulated form of iron-dependent oxidative cell death<sup>57,59,60</sup>. We



221 calculated a correlation between NRF2 activity score and drug sensitivity across 593 cell lines and 481  
222 compounds assayed in the Cancer Therapeutics Response Portal<sup>61</sup>. Strikingly, high NRF2 activity was  
223 associated with relative resistance to almost all agents assayed, including several targeted therapies  
224 used in the treatment of RCC (e.g. sunitinib, axitinib, lenvatinib, temsirolimus), and most notably, to  
225 multiple compounds known to induce electrophilic stress and oxidative cell death (e.g. PRIMA-1, PX-12,  
226 piperlongumine, ML-210, RSL-3) (**Fig. 5d**)<sup>62</sup>. In order to uncover potential vulnerabilities of this otherwise  
227 drug-resistant state, we next surveyed pooled genetic (shRNA and CRISPR) screening data generated  
228 as part of the Cancer Dependency Map effort<sup>63,64</sup>. In both the CRISPR and shRNA datasets, we found  
229 that the outlier dependency of NRF2-high cells is *NFE2L2* itself (**Fig. S5b**). Although tRCC cell lines are  
230 not currently included among those assayed in the Cancer Dependency Map effort, we separately  
231 validated that three tRCC cell lines all demonstrated variable levels of dependency on *NFE2L2*  
232 knockdown, consistent with the notion that direct inhibition of NRF2 is a vulnerability of the NRF2-high  
233 state observed in tRCC (**Fig. S5c**).

234 Next, to determine whether elevated NRF2 activity might be associated with resistance to targeted  
235 therapies in patients, we evaluated molecular data from the IMmotion151 trial (NCT02420821), a Phase  
236 III trial of 915 RCC patients with clear cell or sarcomatoid histology who were randomized to either  
237 sunitinib (multitargeted kinase inhibitor against VEGFRs and PDGFRs) or the combination of  
238 atezolizumab (monoclonal antibody targeting PD-L1) and bevacizumab (monoclonal antibody targeted  
239 VEGF-A)<sup>65</sup>. RNA-Seq performed on tumor biopsies from patients enrolled on this trial revealed 15  
240 patients with *TFEB/TFE3* translocations among 822 with available RNA-seq data (**Fig. 1c**), of which 6  
241 were treated on the sunitinib arm and 9 were treated on the atezolizumab + bevacizumab (AtezoBev)  
242 arm<sup>30</sup>. While AtezoBev showed a modest benefit over sunitinib in progression-free survival (PFS) in the  
243 overall study and amongst ccRCC patients, we observed that tRCC patients receiving sunitinib did  
244 dramatically worse than those receiving AtezoBev (median PFS 3.5 months with sunitinib vs. 15.8 months  
245 with AtezoBev; log-rank  $p=0.004$ ). Consistent with this observation, the extent of benefit derived from  
246 AtezoBev as compared with sunitinib, in patients with tRCC vs. ccRCC, was significantly greater

247 (histology-by-treatment arm interaction Cox p-value=0.008) (**Fig. 5e**). When ccRCC patients treated with  
248 sunitinib were dichotomized based on NRF2 activity score, those with high-NRF2 scores had shorter PFS  
249 compared to with low-NRF2 scores (median PFS 7.1 months for high-NRF2 vs. 11.1 months for low-  
250 NRF2; log-rank p=0.002). In contrast, NRF2 activity score was not associated with a significant difference  
251 in outcome in ccRCC patients treated on the AtezoBev arm (**Fig. 5f**). In the CheckMate cohort including  
252 311 patients with ccRCC with available RNA-seq data (pooled analysis of the CheckMate 009  
253 [NCT01358721], 010 [NCT01354431], and 025 [NCT01668784] clinical trials)<sup>66</sup>, a similar signal was  
254 observed whereby ccRCC patients with a high NRF2 activity score experienced shorter PFS than did  
255 those with a low NRF2 activity score (**Fig. S5d**), on the everolimus arm (median PFS 9.7 months for high-  
256 NRF2 vs. 14.3 months for low-NRF2; log-rank p= 0.031), but not the nivolumab arm<sup>67</sup>. Together, these  
257 results indicate that high NRF2 activity – a defining feature of tRCC – is associated with resistance to  
258 targeted agents used in the treatment of RCC, but may not preclude responses to ICI.

### 259 **Response to immune checkpoint inhibition in tRCC**

260 We sought to further explore the possibility that tRCC may be responsive to ICI. Analysis of responses  
261 from the IMmotion151 study showed that tRCC patients derived significantly greater clinical benefit (CB)  
262 on AtezoBev than on sunitinib (77.8% with AtezoBev vs. 16.7% with sunitinib; Fisher p-value= 0.041).  
263 However, tRCC patients tended to not derive clinical benefit (no clinical benefit; NCB) from sunitinib as  
264 compared with AtezoBev (11.1% with AtezoBev vs. 50.0% with sunitinib; Fisher p-value= 0.235). In  
265 contrast, ccRCC patients tended to have similar CB (65.1% with AtezoBev vs. 64.0% with sunitinib; Fisher  
266 p-value= 0.767) and NCB (15.6% with AtezoBev vs. 16.0% with sunitinib; Fisher p-value= 0.923) rates  
267 whether they received AtezoBev or sunitinib (**Fig. 6a**).

268 In a combined analysis of the IMDC and Harvard datasets, we identified 12 metastatic tRCC patients  
269 who had received ICI in any line of therapy as well as 10 tRCCs that had been treated by TKIs (n= 8  
270 sunitinib; n= 2 pazopanib). Among this cohort, 5 achieved either partial response (n= 3) or stable disease  
271 (n= 2) on an ICI-containing regimen, with several ongoing responses (**Fig. 6b** and **Fig. S6a-b**). Overall,  
272 in this retrospective combined cohort of tRCC patients, the response rate (25.0% with ICI and 0% with

273 TKI; Fisher p-value= 0.220) and overall survival (OS; median OS 62.4 months with ICI and median OS  
274 10.3 months with TKI; log-rank p-value= 0.267) tended to be increased on ICI-based regimens compared  
275 to TKIs (**Fig. S6c-d**), corroborating the result that tRCC patients may derive greater benefit from ICI-  
276 based therapies than VEGF-targeted therapies.

277 We next examined whether immunogenomic features of tRCC could explain responses to ICI in this RCC  
278 subtype, despite a low burden of mutations and CNAs (**Fig. 2a** and **Fig. S2**). In the TCGA cohort, tumor  
279 purity (which is inversely correlated to immune cell infiltration), was lower in tRCC than chRCC (a  
280 classically ICI-resistant subtype<sup>68,69</sup>) (Wilcoxon p-value< 0.001), similar to pRCC (Wilcoxon p-value=  
281 0.160), and higher than ccRCC (Wilcoxon p-value= 0.005) (**Fig. 6c**). Consistently, immune deconvolution  
282 analyses (CIBERSORTx<sup>70</sup>) showed that the inferred percentage of cluster of differentiation 8 (CD8)<sup>+</sup> T  
283 cells was higher in tRCC than in chRCC (Wilcoxon p-value< 0.001), and comparable to that seen in  
284 ccRCC (Wilcoxon p-value= 0.190) and pRCC (Wilcoxon p-value= 0.150) (**Fig. 6d**). Additionally, PD-L1  
285 protein levels on tumor-infiltrating immune cells, as assessed by IHC, in patients on the IMmotion151  
286 trial, were comparable between tRCC and ccRCC patients (41.8% with ccRCC vs. 33.3% with tRCC;  
287 Fisher p-value= 0.604) (**Fig. S6e**).

288 Finally, we sought to more carefully characterize the CD8<sup>+</sup> tumor-infiltrating T cells in tRCC via  
289 multiparametric immunofluorescence<sup>71,72</sup>. We examined 11 ccRCC cases (including 10 with adjacent  
290 normal tissue) and 11 tRCC cases for T cells expressing CD8 or the immune checkpoint markers PD1,  
291 T-cell immunoglobulin and mucin-domain containing-3 (TIM3), and lymphocyte activation protein-3  
292 (LAG3). While the overall CD8<sup>+</sup> T cell density tended to be lower in tRCC samples than in ccRCC samples  
293 (Wilcoxon p-value = 0.065) (**Fig. 6e-f**), the percentage of CD8<sup>+</sup>PD1<sup>+</sup>TIM3<sup>-</sup>LAG3<sup>-</sup> cells (the subset  
294 predictive of a response to PD1/PD-L1-based ICI<sup>71,72</sup>) was not significantly different between tRCC and  
295 ccRCC (**Fig. S6f**). Moreover, the profile of immune checkpoint markers differed significantly between  
296 ccRCC and tRCC; tRCC cases displayed a higher percentage of CD8<sup>+</sup>PD1<sup>+</sup>TIM3<sup>-</sup>LAG3<sup>-</sup> T cells (Wilcoxon  
297 p-value = 0.009) whereas ccRCC cases displayed a higher percentage of CD8<sup>+</sup>PD1<sup>+</sup>TIM3<sup>+</sup>LAG3<sup>-</sup> T cells  
298 (Wilcoxon p-value = 0.040). Altogether, our results are consistent with the notion that tRCCs may benefit

299 from ICI as a result of a permissive immune microenvironment characterized by a tumor-infiltrating T cell  
300 profile distinct from that observed in ccRCC.

301

## 302 DISCUSSION

303 We performed a comprehensive and multicenter characterization of the molecular and clinical features  
304 of 152 tRCCs. While prior studies have identified some genomic and transcriptional features of tRCC,  
305 the broader extensibility of these findings, their clinical actionability, as well as an understanding of how  
306 they compare to other subtypes of RCC have remained unclear<sup>13–15</sup>. Our integrative analysis spans  
307 genomic and transcriptomic data, immunophenotypic analysis, functional validation, and clinical outcome  
308 data from both retrospective cohorts and randomized clinical trials. From these efforts, an increasingly  
309 well-defined landscape of tRCC emerges.

310 The defining – and often singular – genomic alteration in tRCC is the *MiT/TFE* fusion. Our results show  
311 that *TFE3* is by far the most frequently involved *MiT/TFE* gene. While there exists a great diversity of  
312 *MiT/TFE* fusion partners, these partners are highly enriched on certain chromosomes (chr1, chr17, chrX),  
313 raising intriguing questions about whether patterns of spatial genome organization underlie these  
314 recurrent translocations<sup>73–75</sup>. Moreover, our analysis of breakpoint locations across fusions highlights that  
315 the vast majority of *TFE3* fusions arise via in-frame events that preserve functional domains from both  
316 *TFE3* and its partner protein (most of which are RNA binding proteins); this opens the possibility that  
317 *TFE3* fusion partners may confer neomorphic activity to the fusion product. In contrast, much smaller  
318 regions of *TFEB* and *MITF* partner genes appear to be involved in the fusion product. Whether differences  
319 in fusion structure translate to histologic and/or phenotypic differences between *TFE3*-, *TFEB*-, and *MITF*-  
320 translocation RCC warrants further investigation<sup>1,76,77</sup>.

321 Overall, tRCCs are genomically quiet tumors with a low mutational and copy number alteration burden,  
322 a reduced frequency of alterations in genes known to be significantly mutated in other RCC subtypes,  
323 and few recurrent alterations aside from the *MiT/TFE* fusion. A notable exception is homozygous loss at

324 chromosome 9p21.3, which harbors the *CDKN2A/2B* genes, and is found in 19.2% of tRCC cases. Loss  
325 of CDKN2 proteins may be associated with high CDK4/6 activity and may sensitize to CDK4/6 inhibitors<sup>78</sup>.  
326 Co-deletion of *MTAP*, which is located in close proximity to *CDKN2A*, may sensitize to PRMT5  
327 inhibitors<sup>79,80</sup>. Mutations in *TERT* (primarily in the promoter region) were also found in 6.8% of cases.  
328 Notably, both *CDKN2A/B* loss and *TERT* promoter mutations are defining genetic features of malignant  
329 melanoma, a cancer type driven by activated MITF signaling<sup>33,81–83</sup>. Less frequent alterations in the cohort  
330 included multiple genes involved in the DNA damage response (*ATM*, *BRCA2*, *WRN*), though the lack of  
331 specific variant information, the absence of matched normal-based filtering of mutation calls for some  
332 samples, and low alteration frequency preclude drawing strong conclusions about this class of mutations.

333 We identified a heightened response to oxidative stress as a transcriptional hallmark of tRCC. Activated  
334 NRF2 signaling has been linked to oncogenesis and resistance to chemotherapies in various contexts<sup>84</sup>.  
335 Prior studies have indicated that small subsets of both ccRCC and pRCC display heightened NRF2  
336 signaling, generally linked to somatic alterations or DNA methylation in the NRF2 pathway<sup>7,27,85</sup>.  
337 Interestingly, our results suggest that NRF2 signaling is uniformly activated in tRCC in the absence of  
338 detectable somatic alterations in the NRF2 pathway. Notably, multiple NRF2 target genes are also  
339 annotated as MiT/TFE targets (**Fig. 4c**), suggesting a direct link between MiT/TFE fusions and the NRF2  
340 pathway in tRCC. Our results may explain why tRCCs (and ccRCCs with elevated NRF2 signaling)  
341 display worse outcomes with sunitinib than with ICI in clinical datasets, and are consistent with *in vitro*  
342 data suggesting that NRF2 confers resistance to sunitinib and other TKIs<sup>55,86,87</sup>. Whether this signal holds  
343 for extended spectrum kinase inhibitors such as cabozantinib and lenvatinib remains to be determined,  
344 as patients receiving these therapies were not represented in our retrospective cohort. We validate that  
345 *NFE2L2* represents a clear genetic dependency of the NRF2-high state, and suggest that specific NRF2  
346 pathway inhibitors, if developed, may be effective in tRCC<sup>54,88</sup>.

347 Responses to ICI in tRCC are notable given the apparent lack of potential sources of tumor-associated  
348 antigens (i.e. low burden of mutations and indels). Our immune deconvolution analyses and  
349 immunofluorescence studies both support the notion that tRCCs do contain an appreciable density of

350 tumor-infiltrating CD8<sup>+</sup> T cells. The tumor neoantigens recruiting T cells in tRCC may be derived from the  
351 fusion junction, as has also been reported for other fusion-driven malignancies<sup>15,89</sup>. Interestingly, there is  
352 no significant difference in the percentage of CD8<sup>+</sup>PD1<sup>+</sup>TIM3<sup>-</sup>LAG3<sup>-</sup> T cells – the activated non-exhausted  
353 T-cell subset that is implicated in an effective antitumor response – between ccRCC (a classically ICI-  
354 responsive tumor) and tRCC<sup>90–92</sup>. The immunophenotype of exhausted T cells also appears to differ  
355 between ccRCC and tRCC: CD8<sup>+</sup>PD1<sup>+</sup>TIM3<sup>-</sup>LAG3<sup>+</sup> T cells are predominant in tRCC while  
356 CD8<sup>+</sup>PD1<sup>+</sup>TIM3<sup>+</sup>LAG3<sup>-</sup> T cells are predominant in ccRCC. Both TIM3 and LAG3 have been proposed as  
357 immune checkpoints that can be targeted in combination with PD-1/PD-L1. Notably, several trials  
358 combining LAG3 blockade with PD1 blockade are currently underway (and include patients with RCC)<sup>90</sup>  
359 and this combination has recently shown to have efficacy in patients with previously untreated metastatic  
360 melanoma<sup>93</sup>. Our immunophenotypic data provide rationale for the development of this therapeutic  
361 combination in tRCC. Our findings are also consistent with those of a prior study that showed, using a  
362 lung adenocarcinoma mouse model, that activated NRF2 and PI3K/mTOR signaling can lead to changes  
363 in the immune microenvironment that are permissive to ICI response<sup>94</sup>. In tRCC, our results suggest that  
364 both the PI3K/AKT/mTOR pathway and NRF2 may be activated downstream of MiT/TFE fusions (**Fig.**  
365 **4c**)<sup>21</sup>.

366 Our study does have several limitations. First, the cohort is heterogeneous in terms of stage of disease  
367 (localized and metastatic), sequencing platform used, and data types available for analysis. While the  
368 heterogeneity of the cohort is inevitable given the rarity of the disease, the analysis methods we apply  
369 account for dataset-specific biases (**Methods**) and the scale of this study has enabled us to make multiple  
370 novel insights. Second, tRCCs are themselves a heterogeneous group of tumors with respect to fusion  
371 partners, biology, and prognosis<sup>95</sup>. Larger studies or more homogeneous cohorts comprised of  
372 prospectively collected samples will be required to draw strong conclusions about how the specific  
373 *MiT/TFE* gene or its fusion partner influence disease biology. Third, some of our clinical data are  
374 retrospective, which has inherent limitations. Nonetheless, we suggest that the signals observed from  
375 misclassified tRCC patients enrolled on randomized clinical trials for ccRCC, and the corroboration of

376 these signals by translational and retrospective clinical data, may have important implications for the  
377 treatment of tRCC.

378 Altogether, we demonstrate the power of integrative clinico-genomic analysis to illuminate the molecular  
379 underpinnings and clinical features of tRCC. Our work inspires multiple hypotheses that can be pursued  
380 in future studies to further dissect the biology of this rare cancer. These data also lay the framework for  
381 the development and testing of mechanism-driven therapeutic regimens in tRCC.

382



## 383 **METHODS**

### 384 **Clinical tRCC cohorts**

385 The comparison of baseline characteristics and clinical outcomes was done using data from patients  
386 included in two retrospective cohorts of consecutive patients: (1) Harvard cohort (n= 734 ccRCC, n= 97  
387 pRCC, n= 23 chRCC, n= 19 tRCC), a retrospective cohort from the Dana-Farber/Harvard Cancer  
388 Center including patients from Dana-Farber Cancer Institute, Beth Israel Deaconess Medical Center,  
389 and Massachusetts General Hospital and (2) IMDC cohort (n= 6107 ccRCC, n= 396 pRCC, n= 107  
390 chRCC, n= 40 tRCC): a retrospective multi-center cohort of metastatic RCC that includes more than 40  
391 international cancer centers and more than 10,000 patients with metastatic RCC<sup>96</sup>. All patients  
392 consented to an institutional review board (IRB) approved protocol to have their clinical data  
393 retrospectively collected for research purposes and the analysis was performed under a secondary use  
394 protocol, approved by the Dana-Farber Cancer Institute IRB. For the Harvard cohort, tRCC patients  
395 were defined as: (1) positive *TFE3* FISH test or (2) positive *TFE3* test by IHC along with a strongly  
396 suggestive clinico-pathologic history and no FISH testing results available (missing). For the IMDC  
397 cohort, patients were included as tRCCs if they (1) had a positive *TFE3* FISH test, (2) had a positive  
398 *TFE3* IHC test and suggestive clinico-pathologic history and no FISH testing data available (missing),  
399 or (3) no *TFE3* FISH or *TFE3* IHC test results available but suggestive clinico-pathologic history.  
400 Clinico-pathologic diagnoses were used to define comparator RCC histologies (ccRCC, pRCC, and  
401 chRCC). For the IMDC cohort, comparator histologies (controls) were only used from clinical sites that  
402 contributed tRCC cases.

### 403 **Genomic tRCC cohorts**

404 For genomic datasets, tRCCs were identified based on RNA-seq-based fusion calls, a positive *TFE3*  
405 FISH test, or DNA-based fusion calls derived from panel data (MSK-IMPACT or OncoPanel). Clinico-  
406 pathologic diagnoses were used to define the cases of other RCC histologies (ccRCC, pRCC, chRCC,  
407 normal kidney, or other). Data for the Memorial-Sloan Kettering (MSK) cohort was obtained from the

408 study by Marcon et al.<sup>15</sup> and Zehir et al.<sup>97</sup>. Fusion calls for the TCGA cohort were obtained from the  
409 study by Gao et al.<sup>29</sup>, clinico-pathologic data was obtained from Genomic Data Commons  
410 (<https://gdc.cancer.gov/about-data/publications/pancanatlas>), and the pathology slides used in **Fig. 1b**  
411 were obtained from <https://portal.gdc.cancer.gov/>. Data for the PCAWG<sup>98</sup> cohort were obtained from the  
412 ICGC data portal (<https://dcc.icgc.org/releases/PCAWG>). Data for the IMmotion151 (NCT02420821,  
413 Motzer et al.)<sup>30</sup>, Wang et al.<sup>40</sup>, Durinck et al.<sup>32</sup>, Malouf et al.<sup>99</sup>, and Sato et al.<sup>31</sup> cohorts were obtained  
414 from the corresponding studies. For the OncoPanel cohort, DNA extraction, sequencing, and mutation  
415 and copy number calling were performed as previously described for the OncoPanel gene panel  
416 assay<sup>100</sup>. The OncoPanel assay is an institutional analytic platform that is certified for clinical use and  
417 patient reporting under the Clinical Laboratory Improvement Amendments (CLIA) Act. The panel  
418 includes 275 to 447 cancer genes (versions 1 to 3 of the panel). Sample-level data for the OncoPanel  
419 cohort (mutations, gene-level CNA, and clinical metadata) are provided in **Supplementary Table 5**.  
420 The data types available for each dataset are illustrated in **Fig. 1C**, but not all data types were available  
421 for all samples in each cohort. The full list of samples used (including the data types available) and  
422 sequencing platform used for DNA-sequencing (WGS, WES, or panel) are provided in **Supplementary**  
423 **Table 1**.

#### 424 **Analysis of mutation and copy number variants in genomic tRCC cohorts**

425 Mutation calls (all aligned to human genome reference build hg19) were obtained as detailed above.  
426 Specifically, for the MSK cohort<sup>15,97</sup>, WES-based calls were used where available and panel-based data  
427 were otherwise used for tRCC samples. For the TCGA cohort, the mc3 MAF calls<sup>101</sup>  
428 (<https://gdc.cancer.gov/about-data/publications/pancanatlas>) were used. For the Durinck et al.<sup>32</sup> and  
429 Malouf et al. cohort<sup>99</sup>, only samples from patients that had mutation calling based on matched normal  
430 sequencing were included. For the Sato et al. cohort<sup>31</sup>, only the WES calls were used. All mutations  
431 were annotated uniformly using Oncotator<sup>102</sup> (except for the IMmotion151 cohort, for which a MAF was  
432 not available). In order to filter out potential germline mutations in the OncoPanel cohort, mutations  
433 present at an allelic frequency of 0.5% in one of the superpopulations from the 1000 Genomes

434 Project<sup>103</sup> (<https://www.internationalgenome.org/data>) were excluded from all downstream analyses.  
435 For the enrichment analyses, mutations were included if they were truncating (nonsense or splice site),  
436 insertions-deletions (indels), missense mutations, or *TERT* promoter mutations. For the IMmotion151  
437 cohort, mutations were included if they were short-variants or truncating. The mutation load was  
438 computed as the number of all non-synonymous mutations per sample. The indel load was computed  
439 as the number of all indels per sample (either all indels or only frameshift indels). For the OncoPanel  
440 and MSK-IMPACT samples, the mutation and indel loads were normalized to the bait sets of the  
441 version of the panel used. The bait sets<sup>104</sup> for OncoPanel were: v1, 0.753334 Megabases [Mb]; v2,  
442 0.826167 Mb; and v3, 1.315078 Mb. For MSK-IMPACT, the bait sets were: IMPACT341, 0.896665;  
443 IMPACT410, 1.016478; and IMPACT468, 1.139322 Mb.

444 Gene-level copy number data calls were available for the MSK cohort<sup>97</sup>, IMmotion151 cohort<sup>30</sup>,  
445 OncoPanel cohort (**Supplementary Table 5b**), PCAWG  
446 ([https://dcc.icgc.org/releases/PCAWG/consensus\\_cnv/GISTIC\\_analysis/  
447 all\\_thresholded.by\\_genes.rmcnv.pt\\_170207.txt](https://dcc.icgc.org/releases/PCAWG/consensus_cnv/GISTIC_analysis/all_thresholded.by_genes.rmcnv.pt_170207.txt)), and TCGA (<http://firebrowse.org/>; KIPAN dataset). For  
448 all gene-level analyses only focal events (deep deletions and high amplifications) were considered. As  
449 measures of the copy number alteration burden, the aneuploidy score and fraction genome altered  
450 were obtained for the TCGA<sup>105</sup> and MSK<sup>97</sup> cohorts, respectively. Arm-level calls were obtained for the  
451 TCGA cohort<sup>105</sup>.

## 452 **Genomic enrichment analyses**

453 In order to account for the inherent differences between the included cohorts and to maximize the  
454 power of the study to detect differences in mutations and copy number alterations in tRCC versus other  
455 RCC histologies, a meta-analytic approach was adopted for all gene-level enrichment analyses, as has  
456 been done in prior studies<sup>106,107</sup>. First, Fisher's exact tests were used to evaluate the enrichment of  
457 gene alterations (mutations and copy number alterations separately) within each cohort (combined  
458 WES cohort, IMmotion151, PCAWG, OncoPanel, and MSK-IMPACT). For panel-based cohorts, this  
459 enrichment took into account the bait set of each version of the panel used for sequencing (i.e. a gene

460 was counted as missing, and not non-mutated, if not included in the bait set of a version of the panel).

461 The conditional maximal likelihood estimate of the odds ratio and its 95% confidence interval were

462 computed using the `fisher.test()` function from the stats package in R. For each gene, we then obtained

463 pooled estimates of the odds ratio and its 95% confidence interval using a random-effects model with

464 the Paule-Mandel estimator for tau, with treatment arm continuity correction and Knapp-Hartung

465 adjustment. The meta-analysis was performed using the `metabin()` function from the meta package in

466 R<sup>108–110</sup>. The enrichment analysis was performed pairwise between tRCC and each comparator RCC

467 histology separately (ccRCC, pRCC, and chRCC). Genes were included in the enrichment analysis if:

468 (1) they were altered in at least two different cohorts; (2) alteration frequency in tRCC was 3% or more;

469 and (3) were Tier 1 cancer genes as defined in the Cancer Gene Census (accessed on February 17

470 2021)<sup>111</sup>. Genes that had been previously reported to be significantly mutated in ccRCC, pRCC, and

471 chRCC<sup>27</sup> were also included in the analysis. For all analyses, samples that were originally part of the

472 TCGA and PCAWG cohorts were only included in one of the two cohorts as part of the enrichment

473 analyses (cohort assignment reported in **Supplementary Table 1**). The CoMut plot was generated

474 using the CoMut package in Python<sup>112</sup> and genes that were not assessed in specific samples (i.e. not

475 included in the bait sets of the gene panel used) are shown as gray boxes; the corresponding alteration

476 frequency (bar graph at the right-hand side of the CoMut) was adjusted accordingly and reflects only

477 samples in which a particular gene was assessable for alteration. Arm-level comparisons (TCGA

478 cohort) were performed pairwise with RCC histologies using Fisher's exact tests. The mutation and

479 indel loads, as well as the aneuploidy score and fraction genome altered, were compared pairwise with

480 each RCC histology (ccRCC, pRCC, and chRCC) using Wilcoxon rank-sum tests.

#### 481 ***MiT/TFE* fusion identification and characterization**

482 Fusion calls were obtained as detailed under "Genomic tRCC cohorts" above. In particular, for the MSK

483 cohort, determination of fusion partners was based on MSK-IMPACT and/or RNA-seq<sup>15,97</sup> and fusion

484 breakpoints were based on MSK-IMPACT and available for a subset of samples<sup>97</sup>. For the OncoPanel

485 cohort, fusion partners and breakpoints were based on an in-house fusion calling pipeline and were

486 available for a subset of samples. For the TCGA, PCAWG, Wang et al., Sato et al., Durinck et al., and  
487 Malouf et al. cohorts, fusion partners were based on RNA-seq. Of those, the fusion breakpoints were  
488 available for the TCGA, PCAWG, Sato et al., and Durinck et al. cohorts. For the Malouf et al. cohort,  
489 fusion breakpoint locations were inferred based on the reported fusion breakpoint sequences using  
490 BLAT (<https://genome.ucsc.edu/cgi-bin/hgBlat>). All breakpoint locations were aligned to human genome  
491 reference build hg19, except for the TCGA breakpoints which had been originally mapped to hg38 and  
492 were converted to hg19, for the purposes of this analysis, using liftOver ([https://genome.ucsc.edu/cgi-](https://genome.ucsc.edu/cgi-bin/hgLiftOver)  
493 [bin/hgLiftOver](https://genome.ucsc.edu/cgi-bin/hgLiftOver)). The Circos Perl package<sup>113</sup> was used to represent the chromosomal locations of  
494 fusions in a circos plot. The enrichr<sup>114</sup> tool was used to evaluate enrichment of Gene Ontology (GO)  
495 terms among the *MiT/TFE* partner genes. In order to annotate the fusion protein products based on the  
496 breakpoints, breakpoints were first aligned to human genome GRCH37.p13 on NCBI Genome Data  
497 viewer. Functional domains were then annotated using UniPort Protein knowledgebase  
498 UniProtKB/Swiss-Prot And NCBI Conserved Domain Database<sup>115</sup> (CDD v3.19). The presence of Prion-  
499 Like domains (PLD) was analyzed using Prion-Like Amino Acid Composition (PLAAC) web-based  
500 program<sup>116</sup>. Illustrations were made using Illustrator for Biological Sequences (IBS)<sup>117</sup> version 1.0.  
501 Annotated functional domains with abbreviations are provided in **Supplementary table 2**.

## 502 **Cell lines**

503 293T cells were obtained from the American Type Culture Collection. UOK109 and UOK146 cells were  
504 a kind gift of Dr. Marston Linehan (National Cancer Institute). FU-UR-1 cells were a kind gift of Dr. Masako  
505 Ishiguro (Fukuoka University School of Medicine). Cell lines were grown in base media of DMEM (293T,  
506 UOK109, UOK146) or DMEM/F12 (FU-UR-1), supplemented with 10% FBS, 100 U mL<sup>-1</sup> penicillin, 100  
507 µg mL<sup>-1</sup> streptomycin, 2 mM L-glutamine, and 100 µg mL<sup>-1</sup> Normocin (Invivogen).

## 508 ***TFE3* fusion-specific signature**

509 For *TFE3* fusion overexpression experiments, 293T cells were seeded in 6-well plates at 2 x 10<sup>5</sup> cells  
510 per well and after 24 hours were transfected with 500 ng of plasmids encoding *ASPSCR1-TFE3*, *NONO-*

511 *TFE3*, *PRCC-TFE3*, *SFPQ-TFE3*, wild type (WT) *TFE3*, or an empty vector control (all in pLX313). All  
512 transfections were performed in three biological replicates. Cells were harvested 48 hours after  
513 transfection and total RNA was collected using the RNeasy Plus Mini Kit (QIAGEN, #74136). Sample  
514 concentrations were measured using a NanoDrop 8000 Spectrophotometer (Thermo Fisher Scientific)  
515 and sequencing libraries were prepared with poly(A) selection. Libraries were pooled and paired-end 150  
516 bp RNA-sequencing was performed on an Illumina HiSeq. Paired-end sequencing reads were aligned to  
517 the human genome reference build hg38 using STAR v2.7.2<sup>118</sup> and quantified using RSEM v1.3.2<sup>119</sup>.  
518 Transcripts were filtered based on read support (sum of expected read counts across three biological  
519 replicates > 30) prior to gene-level differential expression analysis using the voom transformation in limma  
520 v3.40.6<sup>120</sup>. Transcripts-per-million (TPMs) were used for visualization and clustering. Expected count and  
521 TPM matrices are provided in **Supplementary Table 3**.

522 In order to derive a transcriptional signature that is specific to the *TFE3* fusion, we performed differential  
523 gene expression of each of the fusion conditions (*ASPSR1-TFE3*, *NONO-TFE3*, *PRCC-TFE3*, *SFPQ-*  
524 *TFE3*) versus the WT *TFE3* condition. Genes that were significantly upregulated ( $q < 0.05$  and  $\log_2(\text{fold-}$   
525  $\text{change}) > 0$ ) or significantly downregulated ( $q < 0.05$  and  $\log_2(\text{fold-change}) < 0$ ) across all four comparisons  
526 defined a *TFE3* fusion-specific signature (**Supplementary Table 4**). In order to evaluate the relevance  
527 of the *in vitro*-derived signature to tRCC tumor samples, we performed clustering on 4 independent RNA-  
528 seq datasets that included tRCC samples. The normalized expression matrices used for clustering were  
529 those obtained from TCGA (<https://gdc.cancer.gov/about-data/publications/pancanatlas>), PCAWG  
530 (<https://dcc.icgc.org/releases/PCAWG>), IMmotion151, and Wang et al. as described under “Genomic  
531 tRCC cohorts” above. Clustering was performed in each dataset independently using the Heatmap  
532 function from the ComplexHeatmap<sup>121</sup> package in R, using hierarchical clustering with ward.D2 as the  
533 clustering method and the Kendall correlation distance metric. The average intra-tRCC distance was  
534 used as a metric for density of clustering of tRCCs and was compared to the distance obtained from  
535 clustering using the 1000 most variable genes within each dataset (**Fig. S4**).

### 536 **Differential gene expression analysis**

537 Pairwise differential gene expression analysis was performed between tRCC and each other sample  
538 type, within each dataset independently (TCGA, PCAWG, IMmotion151, Wang et al., and 293T cell line  
539 experiment). Differential gene analysis for the cell line experiment was performed as described above  
540 using the limma package. For the tumor datasets, differential gene expression was performed using  
541 pairwise Wilcoxon rank-sum tests. For all tests, the Benjamini-Hochberg correction was used to  
542 compute q-values and a q-value<0.05 was taken as statistically significant. In order to define a  
543 transcriptional signature specific to tRCC, an Upset plot was computed using the UpsetR package<sup>122</sup>.  
544 The 76 genes that were found to be significantly upregulated in 9 or more of the 14 pairwise  
545 comparisons were plotted in a heatmap (**Fig. 4c**), which included tRCC samples and comparator  
546 samples. Gene pathway annotations were obtained from enrichr<sup>114</sup>. Overlap between the NRF2 and  
547 MITF target genes was evaluated using a one-tailed hypergeometric test. In order to adjust for potential  
548 RNA-seq batch effects between datasets in visualization, gene expression was Z-scored within each  
549 dataset independently. For volcano plots,  $\log_2(\text{fold-change})$  of the mean expression of genes in each  
550 group was used.

### 551 **Gene set enrichment analysis**

552 Pre-ranked gene set enrichment analysis (GSEA) was performed pairwise between tRCC and each  
553 comparator, within each dataset independently, using the using  $-\log_{10}(\text{q-value})$  signed by the sign of the  
554  $\log_2(\text{fold-change})$  of mean gene expression. GSEA was used on the Hallmark gene sets v7.1 from the  
555 Molecular Signatures Database (MSigDB)<sup>123</sup> and a previously defined 55-gene NRF2 signature<sup>124</sup>. For  
556 the Hallmark analysis, the gene sets were ranked by the number of pairwise comparisons that had a  
557 normalized enrichment score (NES)>1 in tRCC vs the other comparators (with the top gene sets  
558 visualized as a dot plot) (**Fig. 4d**).

559 In addition, single sample GSEA (ssGSEA) scores were computed for the 55-gene NRF2 signature  
560 using the GSVA package<sup>56</sup> in R to infer the level of activity of NRF2 in each sample. In order to adjust  
561 for potential RNA-seq batch effects in visualization, NRF2 signature scores were Z-scored within  
562 dataset prior to visualization as a waterfall plot (**Fig. 5a**). Comparison of ssGSEA scores between tumor



563 types in the TCGA cohort was performed using Wilcoxon rank-sum tests. To examine the relationship  
564 of the NRF2 signature with survival outcomes, the NRF2 score was dichotomized at the median in each  
565 treatment arm of each cohort.

### 566 **Analysis of CTRP and DepMap datasets**

567 RNAi genetic dependence scores were obtained from the DEMETER2 Data v6 dataset<sup>125</sup>, CRISPR  
568 genetic dependence scores were obtained from the CRISPR (Avana) Public 21Q1 dataset<sup>126,127</sup> and  
569 drug area under the curve (AUC) values were obtained from the CTRP v2.0 2015 CTD<sup>2</sup> dataset<sup>61,128</sup>.  
570 Cell lines were excluded if they had multiple AUC values for each drug. All datasets were downloaded  
571 from the DepMap Data Download Portal (<https://depmap.org/portal/download/>). NRF2 ssGSEA scores  
572 were calculated from the Broad Institute CCLE RNA-seq dataset. Expression values were upper  
573 quartile normalized prior to analysis. For each drug (or gene), drug AUCs (or gene dependence scores)  
574 were Z-scored and the NRF2 ssGSEA scores were Z-scored, amongst samples having data for both  
575 data types. Pearson's correlation coefficient was used to assess the association between drug AUC Z-  
576 score and NRF2 ssGSEA Z-score as well as between gene dependence Z-score and NRF2 ssGSEA Z-  
577 score. For each correlation, t-statistics were computed ( $t = r \cdot ((n-2)/(1-r^2))^{0.5}$ ), a two-tailed Student's t-  
578 distribution was used to determine p-values, and q-values were computed using a Benjamini-Hochberg  
579 correction.

### 580 **Colony forming assays**

581 shRNAs were cloned into a doxycycline-inducible lentiviral vector as previously described<sup>129</sup>. The  
582 indicated cell lines were transduced with lentivirus expressing doxycycline-inducible shRNA (shRNA  
583 target sequence: CCGGCATTTCACTAAACACAA) and selected with 500 µg/mL of G418 prior to  
584 seeding at equal densities with or without the addition of 1 µg/mL doxycycline. Cell densities ranged from  
585 500-1500 cells per well of 12-well plate depending on the cell line. Fresh complete culture media  
586 with/without doxycycline was replaced every two days prior to fixation and staining with crystal violet after  
587 12-20 days. Colony areas were quantified using Image J v1.53.

## 588 **Multiplex immunofluorescence and image analysis**

589 Cluster of differentiation (CD8), programmed death 1 (PD1), T cell immunoglobulin and mucin domain-3  
590 (TIM3), and Lymphocyte-activation gene 3 (LAG3) multiplex immunofluorescence (IF) was performed as  
591 previously described<sup>66</sup>. Briefly, we used the Perkin Elmer Opal tyramide signal system on a Bond RX  
592 Autostainer (Leica Biosystems). The anti-CD8 antibody (1:5,000, C8/144B, mouse monoclonal antibody,  
593 Agilent) was detected using the Opal 520 fluorophore (1:150, FITC); the anti-TIM3 antibody (1:1,000,  
594 AF2365 goat monoclonal antibody, R&D Systems) was detected using the Opal 540 fluorophore (1:50,  
595 Cy3); the anti-LAG3 antibody (1/10,000, 17B4 mouse monoclonal antibody, LifeSpan Biosciences) was  
596 detected using the Opal 560 fluorophore (1:150, Texas Red); the validated anti-PD-1 antibody (1:5,000,  
597 EH33 mouse monoclonal antibody, Dr. Freeman laboratory, Dana-Farber Cancer Institute, Boston, MA)  
598 was detected using the Opal 690 fluorophore (1:50, Cy5). Whole slide images were acquired at 10x using  
599 the Vectra 3 automated quantitative pathology imaging system (PerkinElmer). Subsequently, at least 5  
600 stamps of 931x698 um were selected per slide in areas of high immune infiltration (hotspots) using Perkin  
601 Elmer Phenochart v 1.0 software. Each stamp was then acquired at 20x using the Vectra 3. Inform 2.2  
602 software was then used in order to deconvolute the multispectral images, as previously described<sup>71</sup>.  
603 Hotspot deconvoluted images in .tiff format were uploaded into Indica Lab HALO platform version 3.0.  
604 For each hotspot, the tumor area was manually annotated by a pathologist (TD). CD8 cells were  
605 phenotyped according to the expression of PD1, TIM3 and LAG3 using the Indica Lab High-Plex FL v2.0  
606 module, using DAPI-based nuclear segmentation and detection of FITC (CD8), Cy3 (TIM3), Texas Red  
607 (LAG3), Cy5 (PD1) positive cells by adapting a dye cytoplasm positive threshold for each slide. A unique  
608 algorithm was created for each whole slide, and each group of hotspots and its accuracy was validated  
609 through visual inspection by two pathologists (TD, SS). Sample-level results of the multiplex  
610 immunofluorescence analysis are provided in **Supplementary Table 6**. Comparisons between tRCC (n=  
611 11), ccRCC (n= 11), and normal (ccRCC adjacent, (n= 10)) were performed using Wilcoxon rank-sum  
612 tests. All tRCC samples were either (1) *TFE3* FISH positive or (2) positive *TFE3* test by IHC along with a  
613 strongly suggestive clinico-pathologic history and no FISH testing results available (missing). For each T

614 cell subset, T cell subset density was calculated as the number of T cells per mm<sup>2</sup>. Percentage of a T cell  
615 subset was defined as the density of the T cell subset divided by the density of CD8<sup>+</sup> T cells in the sample.

### 616 **Immune deconvolution and immune analyses**

617 CIBERSORTx<sup>70</sup> (Job type: “Impute cell fractions”), in absolute mode, with B mode batch correction, with  
618 quantile normalization disabled, and in 1000 permutations was used on the LM22 signature in order to  
619 infer the immune cell composition of samples from RNA-seq in the TCGA cohort. All samples which  
620 had a p-value for deconvolution >0.05 were considered to have failed deconvolution and were therefore  
621 discarded from all downstream analyses. Relative cell proportions were obtained by normalizing the  
622 CIBERSORTx output to the sample-level sum of cell counts (in order to obtain percentages of immune  
623 infiltration). Purity estimates for the TCGA cohort were obtained for the TCGA cohort from the Taylor et  
624 al. study<sup>105</sup>. CD8<sup>+</sup> T cell density and purity were compared pairwise between tRCC and each other RCC  
625 histology (ccRCC, pRCC, and chRCC) using Wilcoxon rank-sum tests. Sample-level PD-L1 protein  
626 expression by IHC on tumor-infiltrating immune cells (PD-L1 ≥ 1%) for the IMmotion151 trial were  
627 obtained from the Motzer et al. study<sup>30</sup> and compared using a Fisher’s exact test between tRCC and  
628 ccRCC.

### 629 **Clinical and survival analyses**

630 Tumor stage was obtained from Genomic Data Commons ([https://gdc.cancer.gov/about-](https://gdc.cancer.gov/about-data/publications/pancanatlas)  
631 [data/publications/pancanatlas](https://gdc.cancer.gov/about-data/publications/pancanatlas)) for the TCGA cohort and was defined using American Joint Committee  
632 on Cancer (AJCC) 8<sup>th</sup> edition for the IMDC and Harvard cohorts. IMDC risk groups (a previously  
633 validated prognostic model for patients with metastatic RCC) were defined as previously described<sup>130</sup>.  
634 Tumor stage (I/II vs III/IV), IMDC risk groups (favorable, intermediate, poor), and sex were compared  
635 pairwise between tRCC and each other RCC histology (ccRCC, pRCC, and chRCC) using Fisher’s  
636 exact test. Age at initial RCC diagnosis was compared between tRCC and each other RCC histology  
637 (ccRCC, pRCC, and chRCC) using Wilcoxon rank-sum tests. Sankey diagrams for the Harvard and  
638 IMDC cohorts were computed using the ggalluvial package in R.

639 For all survival endpoints, the Kaplan-Meier method was used to summarize survival distributions. For  
640 the TCGA cohort, progression-free interval (PFI) was defined as the period from the date of diagnosis  
641 until the date of the first occurrence of a new tumor event (includes disease progression, locoregional  
642 recurrence, distant metastasis, new primary tumor, or death with tumor). Patients were censored if they  
643 were alive without any of these events at last follow-up or had died without tumor<sup>131</sup>. Overall survival  
644 (OS) was defined as the period from the start of systemic therapy until death. Patients were censored if  
645 they were alive at last follow-up. Time-to-treatment failure (TTF) was defined from the start of the line of  
646 systemic therapy to the end of that line of therapy or death from any cause. Since assessment of  
647 responses in retrospective cohorts (Harvard and IMDC cohorts) was not subject to radiological review  
648 specifically for the purpose of this study, responses were defined based on RECIST v1.1 criteria<sup>132</sup> as  
649 available by retrospective review. Patients were censored if they were alive and still on the line of  
650 therapy at last follow-up. Progression-free survival (PFS) was defined (in the CheckMate and  
651 IMmotion151 cohorts) from the time of randomization or start of first dose until disease progression or  
652 death. Patients were censored if they were alive at last follow-up. For all survival endpoints, pairwise  
653 comparisons were performed using log-rank tests. In the IMmotion151 cohort, a Cox model that  
654 included an interaction term (histology-by-treatment arm) was used to evaluate the difference in the  
655 extent of benefit derived with atezolizumab + bevacizumab versus sunitinib in tRCC versus ccRCC. In  
656 the Harvard/IMDC pooled cohort, all patients who got ICI-based therapies were included in the ICI  
657 group. If patients received multiple lines of ICI-based therapies, the first ICI-based regimen was used  
658 for the analysis of clinical outcomes. All other patients had received TKIs and were assigned to the TKI  
659 group. If patients received multiple lines of TKIs, the first TKI regimen was used for the analysis of  
660 clinical outcomes.

661 Clinical benefit (CB) was defined as an objective response (complete response or partial response) or  
662 stable disease with PFS of at least 6 months. No clinical benefit (NCB) was defined as progressive  
663 disease with PFS less than 3 months. All other patients (not meeting criteria for CB or NCB) were  
664 classified as having intermediate clinical benefit (ICB). In the IMmotion151 cohort, rates of CB and NCB

665 were compared between the atezolizumab + bevacizumab and sunitinib arms, in patients with tRCC  
666 and ccRCC separately, using Fisher's exact test.

### 667 **Statistics**

668 All downstream analyses were done using R v3.6.1, Python v3.8.5 (on Spyder v4.1.5), Circos v0.69.9,  
669 or GraphPad PRISM 9. For boxplots, the upper and lower hinges represent the 75<sup>th</sup> and 25<sup>th</sup>  
670 percentiles, respectively. The whiskers extend in both directions until the largest or lowest value not  
671 further than 1.5 times the interquartile range from the corresponding hinge. All tests were two-tailed  
672 (unless otherwise specified) and considered statistically significant if  $p < 0.05$  or  $q < 0.05$ .

### 673 **Data availability statement**

674 All relevant data are available from the authors and/or are included with the manuscript. The list of  
675 samples used (including the data types available) and sequencing platform used for DNA-sequencing  
676 (WGS, WES, or panel) are provided in **Supplementary Table 1**. The expression matrix (RSEM  
677 expected counts and TPMs) derived from the RNA-sequencing of the cell lines in the *in vitro*  
678 experiment represented in **Figure 4a** is provided in **Supplementary Table 3**. For the OncoPanel  
679 cohort, sample-level data (mutation, copy number, and clinical metadata) are provided in  
680 **Supplementary Table 5**. Sample-level data from the multiparametric immunofluorescence cohort are  
681 provided in **Supplementary Table 6**.

### 682 **Code availability statement**

683 Algorithms used for data analysis are all publicly available from the indicated references in the  
684 **Methods** section. Any other queries about the custom code used in this study should be directed to the  
685 corresponding authors of this study.

686

## 687 **Acknowledgements**

688 We thank the OncoPanel study team and the patients who contributed their data to research and  
689 participated in clinical trials. We thank all contributors to The International Metastatic Renal-Cell  
690 Carcinoma Database Consortium for their data contributions. This work was supported in part by The  
691 Friends of Dana-Farber (S.R.V.), Claudia Adams Barr Program for Innovative Cancer Research  
692 (S.R.V.), Clinician-Scientist Development Award from the Doris Duke Charitable Foundation (S.R.V.),  
693 Department of Defense Kidney Cancer Research Program (W81XWH-19-1-0815) (S.R.V.), an  
694 Independent Investigator Grant from the Rally Foundation for Childhood Cancer Research (S.R.V), and  
695 the Dana-Farber / Harvard Cancer Center Kidney Cancer SPORE (P50-CA101942) (D.A.B., D.F.M.,  
696 S.S., T.K.C., S.R.V.). T.K.C. is supported by the Kohlberg Chair at Harvard Medical School and the  
697 Trust Family, Michael Brigham, and Loker Pinard Funds for Kidney Cancer Research at DFCI. J.N.  
698 acknowledges support by NIH F31 CA250136. N.I.V. is supported by Damon Runyon Physician-  
699 Scientist Training Award, Conquer Cancer Foundation YIA, SITC Genentech Award. D.A.B. is  
700 supported by the Dana-Farber / Harvard Cancer Center Kidney Cancer SPORE Career Enhancement  
701 Program (NCI P50CA101942-15), DoD CDMRP (KC170216, KC190130), and the DoD Academy of  
702 Kidney Cancer Investigators (KC190128).

## 703 **Author contributions**

704 Conception and Design: Ziad Bakouny, Eliezer M. Van Allen, Toni K. Choueiri, Srinivas R. Viswanathan  
705 Provision of study material or patients: Ziad Bakouny, Praful Ravi, Xin Gao, David A. Braun, Eliezer M.  
706 Van Allen, Toni K. Choueiri, Srinivas R. Viswanathan  
707 Collection and assembly of data: Ziad Bakouny, Praful Ravi, Jiao Li, Stephen Tang, Thomas Denize,  
708 Emma R. Garner, Laure Hirsch, John A. Steinharter, Gabrielle Bouchard, Emily Walton, Destiny West,  
709 Chris Labaki, Shaan Dudani, Chun-Loo Gan, Vidyalakshmi Sethunath, Filipe LF. Carvalho, Michelle S.  
710 Hirsch, Gwo-Shu Mary Lee, Bradley A. McGregor, Steven L. Chang, Adam S. Feldman, Catherine J.

711 Wu, David F. McDermott, Daniel Y.C. Heng, Eliezer M. Van Allen, Toni K. Choueiri, Srinivas R.

712 Viswanathan

713 Data Analysis and Interpretation: Ziad Bakouny, Ananthan Sadagopan, Nebiyou Y. Metaferia, Shatha

714 AbuHammad, Stephen Tang, Thomas Denize, David A. Braun, Alma Imamovic, Cora Ricker, Natalie I.

715 Vokes, Jackson Nyman, Jihye Park, Rizwan Haq, Eliezer M. Van Allen, Toni K. Choueiri, Srinivas R.

716 Viswanathan

717 Manuscript writing and revision: All authors

718 Final approval of manuscript: All authors

719 Accountable for all aspects of work: All authors

720 **Competing Interests statement**

721 The following authors report competing interests (all outside of the submitted work):

722 Z.B.: Research funding from Bristol-Myers Squibb & Genentech/imCORE; Honoraria from UpToDate.

723 X.G.: Advisory board for Exelixis.

724 D.A.B.: Nonfinancial support from Bristol Myers Squibb, honoraria from LM Education/Exchange

725 Services, advisory board fees from Exelixis, and consulting/personal fees from Octane Global, Defined

726 Health, Dedham Group, Adept Field Solutions, Slingshot Insights, Blueprint Partnerships, Charles River

727 Associates, Trinity Group, and Insight Strategy, outside of the submitted work.

728 N.I.V.: Advisory board to Sanofi/Genzyme.

729 M.S.H.: Consultant, Janssen Pharmaceuticals; UpToDate.

730 R.H.: Research funding from Novartis.

731 B.A.M.: Consultant for Bayer, Astellas, AstraZeneca, Seattle Genetics, Exelixis, Nektar, Pfizer,

732 Janssen, Genentech, Eisai, Dendreon, Bristol Myers Squibb, Calithera, and EMD Serono. Research

733 funding to the institution from Bristol Myers Squibb, Calithera, Exelixis, and Seattle Genetics.



734 A.S.F.: Olympus America, Inc – Consultant; Roche, Janssen – Honoraria; Vessi Medical - Advisory  
735 Board.

736 C.J.W.: Equity holder of BioNTech, Inc; Research funding from Pharmacyclics.

737 D.F.M.: Honoraria from BMS, Pfizer, Merck, Alkermes, Inc., EMD Serono, Eli Lilly and Company,  
738 lovance, Eisai Inc., Werewolf Therapeutics, and Calithera Biosciences; Research Support from BMS,  
739 Merck, Genentech, Pfizer, Exelixis, X4 Pharma, and Alkermes, Inc.

740 D.Y.C.H.: Consultancies and research funding from Pfizer, Novartis, BMS, Merck, Eisai, Ipsen, Exelixis.

741 S.S.: Grants from Exelixis, grants from Bristol-Myers Squibb, personal fees from Merck, grants and  
742 personal fees from AstraZeneca, personal fees from CRISPR Therapeutics, personal fees from NCI,  
743 and personal fees from AACR; a patent for Biogenex with royalties paid.

744 E.M.V.A.: Advisory/Consulting: Tango Therapeutics, Genome Medical, Invitae, Enara Bio, Janssen,  
745 Manifold Bio, Monte Rosa; Research support: Novartis, BMS; Equity: Tango Therapeutics, Genome  
746 Medical, Syapse, Enara Bio, Manifold Bio, Microsoft, Monte Rosa; Patents: Institutional patents filed on  
747 chromatin mutations and immunotherapy response, and methods for clinical interpretation.

748 T.K.C.: Research (Institutional and personal): Alexion, Analysis Group, AstraZeneca, Aveo, Bayer,  
749 Bristol Myers-Squibb/ER Squibb and sons LLC, Calithera, Cerulean, Corvus, Eisai, Exelixis, F.  
750 Hoffmann-La Roche, Foundation Medicine Inc., Genentech, GlaxoSmithKline, Ipsen, Lilly, Merck,  
751 Novartis, Peloton, Pfizer, Prometheus Labs, Roche, Roche Products Limited, Sanofi/Aventis, Takeda,  
752 Tracon; Consulting/honoraria or Advisory Role: Alexion, Analysis Group, AstraZeneca, Aveo, Bayer,  
753 Bristol Myers-Squibb/ER Squibb and sons LLC, Cerulean, Corvus, Eisai, EMD Serono, Exelixis,  
754 Foundation Medicine Inc., Genentech, GlaxoSmithKline, Heron Therapeutics, Infinity Pharma, Ipsen,  
755 Jansen Oncology, IQVIA, Lilly, Merck, NCCN, Novartis, Peloton, Pfizer, Pionyr, Prometheus Labs,  
756 Roche, Sanofi/Aventis, Surface Oncology, Tempest, Up-to-Date. CME-related events (e.g.: OnCLive,  
757 PVI, MJH Life Sciences). NCI GU Steering Committee; Stock ownership: Pionyr, Tempest; Patents  
758 filed, royalties or other intellectual properties: related to biomarkers of immune checkpoint blockers and

- 759 ctDNA; Travel, accommodations, expenses, medical writing in relation to consulting, advisory roles, or  
760 honoraria; No speaker's bureau.
- 761 S.R.V.: Consulting, MPM Capital and Vida Ventures. Spouse is an employee of and holds equity in  
762 Kojin Therapeutics. J.L. & S.R.V: institutional patent application on targets in tRCC.
- 763 All other authors report no competing interests.

764 **REFERENCES**

- 765 1. Kauffman, E. C. *et al.* Molecular genetics and cellular features of TFE3 and TFEB fusion kidney cancers. *Nat*  
766 *Rev Urol* **11**, 465–475 (2014).
- 767 2. Moch, H., Cubilla, A. L., Humphrey, P. A., Reuter, V. E. & Ulbright, T. M. The 2016 WHO Classification of  
768 Tumours of the Urinary System and Male Genital Organs—Part A: Renal, Penile, and Testicular Tumours.  
769 *European Urology* **70**, 93–105 (2016).
- 770 3. Argani, P. *et al.* Xp11 Translocation Renal Cell Carcinoma in Adults: Expanded Clinical, Pathologic, and  
771 Genetic Spectrum. *The American Journal of Surgical Pathology* **31**, 1149–1160 (2007).
- 772 4. Calìò, A., Segala, D., Munari, E., Brunelli, M. & Martignoni, G. MiT Family Translocation Renal Cell Carcinoma:  
773 from the Early Descriptions to the Current Knowledge. *Cancers (Basel)* **11**, (2019).
- 774 5. Xu, L. *et al.* Xp11.2 translocation renal cell carcinomas in young adults. *BMC Urology* **15**, 57 (2015).
- 775 6. Baba, M. *et al.* TFE3 Xp11.2 Translocation Renal Cell Carcinoma Mouse Model Reveals Novel Therapeutic  
776 Targets and Identifies GPNMB as a Diagnostic Marker for Human Disease. *Mol Cancer Res* **17**, 1613–1626  
777 (2019).
- 778 7. Comprehensive Molecular Characterization of Papillary Renal-Cell Carcinoma. *New England Journal of*  
779 *Medicine* **374**, 135–145 (2016).
- 780 8. Clark, J. *et al.* Fusion of splicing factor genes PSF and NonO (p54nrb) to the TFE3 gene in papillary renal cell  
781 carcinoma. *Oncogene* **15**, 2233–2239 (1997).
- 782 9. Linehan, W. M. Genetic basis of kidney cancer: role of genomics for the development of disease-based  
783 therapeutics. *Genome Res* **22**, 2089–2100 (2012).
- 784 10. Linehan, W. M. *et al.* The Metabolic Basis of Kidney Cancer. *Cancer Discov* **9**, 1006–1021 (2019).
- 785 11. Sidhar, S. K. *et al.* The t(X;1)(p11.2;q21.2) translocation in papillary renal cell carcinoma fuses a novel gene  
786 PRCC to the TFE3 transcription factor gene. *Hum Mol Genet* **5**, 1333–1338 (1996).

- 787 12. Zhong, M. *et al.* Dual-color, Break-apart FISH Assay on Paraffin-embedded Tissues as an Adjunct to Diagnosis  
788 of Xp11 Translocation Renal Cell Carcinoma and Alveolar Soft Part Sarcoma. *The American Journal of*  
789 *Surgical Pathology* **34**, 757–766 (2010).
- 790 13. Malouf, G. G. *et al.* Genomic heterogeneity of translocation renal cell carcinoma. *Clin. Cancer Res.* **19**, 4673–  
791 4684 (2013).
- 792 14. Malouf, G. G. *et al.* Next-Generation Sequencing of Translocation Renal Cell Carcinoma Reveals Novel RNA  
793 Splicing Partners and Frequent Mutations of Chromatin-Remodeling Genes. *Clin Cancer Res* **20**, 4129–4140  
794 (2014).
- 795 15. Marcon, J. *et al.* Comprehensive Genomic Analysis of Translocation Renal Cell Carcinoma Reveals Copy-  
796 Number Variations as Drivers of Disease Progression. *Clin. Cancer Res.* (2020) doi:10.1158/1078-0432.CCR-  
797 19-3283.
- 798 16. Choueiri, T. K. & Motzer, R. J. Systemic Therapy for Metastatic Renal-Cell Carcinoma. *New England Journal of*  
799 *Medicine* **376**, 354–366 (2017).
- 800 17. Ambalavanan, M. & Geller, J. I. Treatment of advanced pediatric renal cell carcinoma. *Pediatr Blood Cancer*  
801 **66**, e27766 (2019).
- 802 18. Boilève, A. *et al.* Immune checkpoint inhibitors in MITF family translocation renal cell carcinomas and  
803 genetic correlates of exceptional responders. *J. immunotherapy cancer* **6**, 159 (2018).
- 804 19. Chanzá, N. M. *et al.* Cabozantinib in advanced non-clear-cell renal cell carcinoma: a multicentre,  
805 retrospective, cohort study. *Lancet Oncol* **20**, 581–590 (2019).
- 806 20. Choueiri, T. K. *et al.* Vascular endothelial growth factor-targeted therapy for the treatment of adult  
807 metastatic Xp11.2 translocation renal cell carcinoma. *Cancer* **116**, 5219–5225 (2010).
- 808 21. Damayanti, N. P. *et al.* Therapeutic targeting of TFE3/IRS-1/PI3K/mTOR axis in translocation renal cell  
809 carcinoma. *Clinical Cancer Research* clincanres.0269.2018 (2018) doi:10.1158/1078-0432.CCR-18-0269.
- 810 22. Malouf, G. G. *et al.* Targeted agents in metastatic Xp11 translocation/TFE3 gene fusion renal cell carcinoma  
811 (RCC): a report from the Juvenile RCC Network. *Ann. Oncol.* **21**, 1834–1838 (2010).

- 812 23. Rua Fernández, O. R. *et al.* Renal Cell Carcinoma Associated With Xp11.2 Translocation/TFE3 Gene-fusion: A  
813 Long Response to mammalian target of rapamycin (mTOR) Inhibitors. *Urology* **117**, 41–43 (2018).
- 814 24. Hayes, M. *et al.* Molecular-genetic analysis is essential for accurate classification of renal carcinoma  
815 resembling Xp11.2 translocation carcinoma. *Virchows Arch* **466**, 313–322 (2015).
- 816 25. Wang, X.-T. *et al.* RNA sequencing of Xp11 translocation-associated cancers reveals novel gene fusions and  
817 distinctive clinicopathologic correlations. *Mod. Pathol.* (2018).
- 818 26. Chen, F. *et al.* Multilevel Genomics-Based Taxonomy of Renal Cell Carcinoma. *Cell Reports* **14**, 2476–2489  
819 (2016).
- 820 27. Ricketts, C. J. *et al.* The Cancer Genome Atlas Comprehensive Molecular Characterization of Renal Cell  
821 Carcinoma. *Cell Reports* **23**, 313-326.e5 (2018).
- 822 28. Sukov, W. R. *et al.* TFE3 rearrangements in adult renal cell carcinoma: clinical and pathologic features with  
823 outcome in a large series of consecutively treated patients. *Am J Surg Pathol* **36**, 663–670 (2012).
- 824 29. Gao, Q. *et al.* Driver Fusions and Their Implications in the Development and Treatment of Human Cancers.  
825 *Cell Reports* **23**, 227-238.e3 (2018).
- 826 30. Motzer, R. J. *et al.* Molecular Subsets in Renal Cancer Determine Outcome to Checkpoint and Angiogenesis  
827 Blockade. *Cancer Cell* **38**, 803-817.e4 (2020).
- 828 31. Sato, Y. *et al.* Integrated molecular analysis of clear-cell renal cell carcinoma. *Nature Genetics* **45**, 860–867  
829 (2013).
- 830 32. Durinck, S. *et al.* Spectrum of diverse genomic alterations define non-clear cell renal carcinoma subtypes.  
831 *Nat Genet* **47**, 13–21 (2015).
- 832 33. Huang, F. W. *et al.* Highly recurrent TERT promoter mutations in human melanoma. *Science* **339**, 957–959  
833 (2013).
- 834 34. Taylor, A. M. *et al.* Genomic and Functional Approaches to Understanding Cancer Aneuploidy. *Cancer cell*  
835 (2018) doi:10.1016/j.ccell.2018.03.007.

- 836 35. Cunningham, J. L. *et al.* Common pathogenetic mechanism involving human chromosome 18 in familial and  
837 sporadic ileal carcinoid tumors. *Genes Chromosomes Cancer* **50**, 82–94 (2011).
- 838 36. Brady, S. W. *et al.* Pan-neuroblastoma analysis reveals age- and signature-associated driver alterations. *Nat*  
839 *Commun* **11**, (2020).
- 840 37. Suarez-Merino, B. *et al.* Microarray analysis of pediatric ependymoma identifies a cluster of 112 candidate  
841 genes including four transcripts at 22q12.1-q13.3,. *Neuro-oncol* **7**, 20–31 (2005).
- 842 38. Hershey, C. L. & Fisher, D. E. Mitf and Tfe3: members of a b-HLH-ZIP transcription factor family essential for  
843 osteoclast development and function. *Bone* **34**, 689–696 (2004).
- 844 39. Hoadley, K. A. *et al.* Cell-of-Origin Patterns Dominate the Molecular Classification of 10,000 Tumors from 33  
845 Types of Cancer. *Cell* **173**, 291-304.e6 (2018).
- 846 40. Wang, X. *et al.* Malignant melanotic Xp11 neoplasms exhibit a clinicopathologic spectrum and gene  
847 expression profiling akin to alveolar soft part sarcoma: a proposal for reclassification. *J. Pathol.* **251**, 365–  
848 377 (2020).
- 849 41. Pan-cancer analysis of whole genomes | Nature. <https://www.nature.com/articles/s41586-020-1969-6>.
- 850 42. Hoek, K. S. *et al.* Novel MITF targets identified using a two-step DNA microarray strategy. *Pigment Cell &*  
851 *Melanoma Research* **21**, 665–676 (2008).
- 852 43. Lachmann, A. *et al.* ChEA: transcription factor regulation inferred from integrating genome-wide ChIP-X  
853 experiments. *Bioinformatics* **26**, 2438–2444 (2010).
- 854 44. Canela, L. *et al.* Transcriptional profiling of striatal neurons in response to single or concurrent activation of  
855 dopamine D2, adenosine A2A and metabotropic glutamate type 5 receptors: Focus on beta-synuclein  
856 expression. *Gene* **508**, 199–205 (2012).
- 857 45. Boyer, N. P., Monkiewicz, C., Menon, S., Moy, S. S. & Gupton, S. L. Mammalian TRIM67 Functions in Brain  
858 Development and Behavior. *eNeuro* **5**, (2018).
- 859 46. Star, E. N. *et al.* Regulation of retinal interneuron subtype identity by the Iroquois homeobox gene *lrx6*.  
860 *Development* **139**, 4644–4655 (2012).

- 861 47. Rezaei, K. A., Chen, Y., Cai, J. & Sternberg, P. Modulation of Nrf2-Dependent Antioxidant Functions in the  
862 RPE by Zip2, a Zinc Transporter Protein. *Invest. Ophthalmol. Vis. Sci.* **49**, 1665–1670 (2008).
- 863 48. Kim, H. *et al.* Tmem64 modulates calcium signaling during RANKL-mediated osteoclast differentiation. *Cell*  
864 *Metab* **17**, 249–260 (2013).
- 865 49. Sun, M., Luong, G., Plastikwala, F. & Sun, Y. Control of Rab7a activity and localization through endosomal  
866 type I gamma PIP 5-kinase is required for endosome maturation and lysosome function. *FASEB j.* **34**, 2730–  
867 2748 (2020).
- 868 50. Groenewoud, M. J. & Zwartkuis, F. J. T. Rheb and Rags come together at the lysosome to activate mTORC1.  
869 *Biochemical Society Transactions* **41**, 951–955 (2013).
- 870 51. McConnell, M. *et al.* Atp6v1c1 Facilitates Breast Cancer Growth and Bone Metastasis through the mTORC1  
871 Pathway. *The FASEB Journal* **29**, 284.8 (2015).
- 872 52. Subramanian, A. *et al.* Gene set enrichment analysis: a knowledge-based approach for interpreting genome-  
873 wide expression profiles. *Proc. Natl. Acad. Sci. U.S.A.* **102**, 15545–15550 (2005).
- 874 53. Liberzon, A. *et al.* The Molecular Signatures Database Hallmark Gene Set Collection. *Cell Systems* **1**, 417–425  
875 (2015).
- 876 54. Menegon, S., Columbano, A. & Giordano, S. The Dual Roles of NRF2 in Cancer. *Trends in Molecular Medicine*  
877 **22**, 578–593 (2016).
- 878 55. Clerici, S. & Boletta, A. Role of the KEAP1-NRF2 Axis in Renal Cell Carcinoma. *Cancers* **12**, 3458 (2020).
- 879 56. Hänzelmann, S., Castelo, R. & Guinney, J. GSEA: gene set variation analysis for microarray and RNA-Seq  
880 data. *BMC Bioinformatics* **14**, 7 (2013).
- 881 57. Takahashi, N. *et al.* 3D Culture Models with CRISPR Screens Reveal Hyperactive NRF2 as a Prerequisite for  
882 Spheroid Formation via Regulation of Proliferation and Ferroptosis. *Mol Cell* **80**, 828-844.e6 (2020).
- 883 58. DeNicola, G. M. *et al.* Oncogene-induced Nrf2 transcription promotes ROS detoxification and tumorigenesis.  
884 *Nature* **475**, 106–109 (2011).



- 885 59. Harris, I. S. *et al.* Deubiquitinases Maintain Protein Homeostasis and Survival of Cancer Cells upon  
886 Glutathione Depletion. *Cell Metab* **29**, 1166-1181.e6 (2019).
- 887 60. Xue, D., Zhou, X. & Qiu, J. Emerging role of NRF2 in ROS-mediated tumor chemoresistance. *Biomed*  
888 *Pharmacother* **131**, 110676 (2020).
- 889 61. Rees, M. G. *et al.* Correlating chemical sensitivity and basal gene expression reveals mechanism of action.  
890 *Nat Chem Biol* **12**, 109–116 (2016).
- 891 62. Viswanathan, V. S. *et al.* Dependency of a therapy-resistant state of cancer cells on a lipid peroxidase  
892 pathway. *Nature* **547**, 453–457 (2017).
- 893 63. Ghandi, M. *et al.* Next-generation characterization of the Cancer Cell Line Encyclopedia. *Nature* **569**, 503–  
894 508 (2019).
- 895 64. Tsherniak, A. *et al.* Defining a Cancer Dependency Map. *Cell* **170**, 564-576.e16 (2017).
- 896 65. Rini, B. I. *et al.* Atezolizumab plus bevacizumab versus sunitinib in patients with previously untreated  
897 metastatic renal cell carcinoma (IMmotion151): a multicentre, open-label, phase 3, randomised controlled  
898 trial. *The Lancet* **393**, 2404–2415 (2019).
- 899 66. Braun, D. A. *et al.* Interplay of somatic alterations and immune infiltration modulates response to PD-1  
900 blockade in advanced clear cell renal cell carcinoma. *Nat Med* **26**, 909–918 (2020).
- 901 67. Motzer, R. J. *et al.* Nivolumab versus Everolimus in Advanced Renal-Cell Carcinoma. *New England Journal of*  
902 *Medicine* **373**, 1803–1813 (2015).
- 903 68. McDermott, D. F. *et al.* Open-Label, Single-Arm, Phase II Study of Pembrolizumab Monotherapy as First-Line  
904 Therapy in Patients With Advanced Non-Clear Cell Renal Cell Carcinoma. *J Clin Oncol* **39**, 1029–1039 (2021).
- 905 69. McGregor, B. A. *et al.* Results of a Multicenter Phase II Study of Atezolizumab and Bevacizumab for Patients  
906 With Metastatic Renal Cell Carcinoma With Variant Histology and/or Sarcomatoid Features. *J Clin Oncol* **38**,  
907 63–70 (2020).
- 908 70. Newman, A. M. *et al.* Determining cell type abundance and expression from bulk tissues with digital  
909 cytometry. *Nature Biotechnology* **37**, 773–782 (2019).

- 910 71. Pignon, J.-C. *et al.* irRECIST for the Evaluation of Candidate Biomarkers of Response to Nivolumab in  
911 Metastatic Clear Cell Renal Cell Carcinoma: Analysis of a Phase II Prospective Clinical Trial. *Clin Cancer Res*  
912 **25**, 2174–2184 (2019).
- 913 72. Ficial, M. *et al.* Expression of T-Cell Exhaustion Molecules and Human Endogenous Retroviruses as Predictive  
914 Biomarkers for Response to Nivolumab in Metastatic Clear Cell Renal Cell Carcinoma. *Clin Cancer Res* **27**,  
915 1371–1380 (2021).
- 916 73. Engreitz, J. M., Agarwala, V. & Mirny, L. A. Three-Dimensional Genome Architecture Influences Partner  
917 Selection for Chromosomal Translocations in Human Disease. *PLOS ONE* **7**, e44196 (2012).
- 918 74. Lin, C. *et al.* Nuclear Receptor-Induced Chromosomal Proximity and DNA Breaks Underlie Specific  
919 Translocations in Cancer. *Cell* **139**, 1069–1083 (2009).
- 920 75. Roix, J. J., McQueen, P. G., Munson, P. J., Parada, L. A. & Misteli, T. Spatial proximity of translocation-prone  
921 gene loci in human lymphomas. *Nature Genetics* **34**, 287–291 (2003).
- 922 76. Inamura, K. *et al.* Diverse Fusion Patterns and Heterogeneous Clinicopathologic Features of Renal Cell  
923 Carcinoma With t(6;11) Translocation. *The American Journal of Surgical Pathology* **36**, 35–42 (2012).
- 924 77. Xia, Q.-Y. *et al.* Novel gene fusion of PRCC–MITF defines a new member of MiT family translocation renal cell  
925 carcinoma: clinicopathological analysis and detection of the gene fusion by RNA sequencing and FISH.  
926 *Histopathology* **72**, 786–794 (2018).
- 927 78. Álvarez-Fernández, M. & Malumbres, M. Mechanisms of Sensitivity and Resistance to CDK4/6 Inhibition.  
928 *Cancer Cell* **37**, 514–529 (2020).
- 929 79. Kryukov, G. V. *et al.* MTAP deletion confers enhanced dependency on the PRMT5 arginine  
930 methyltransferase in cancer cells. *Science* **351**, 1214–1218 (2016).
- 931 80. Mavrakis, K. J. *et al.* Disordered methionine metabolism in MTAP/CDKN2A-deleted cancers leads to  
932 dependence on PRMT5. *Science* **351**, 1208–1213 (2016).
- 933 81. Garraway, L. A. *et al.* Integrative genomic analyses identify MITF as a lineage survival oncogene amplified in  
934 malignant melanoma. *Nature* **436**, 117–122 (2005).

- 935 82. Liu, L. *et al.* Mutation of the CDKN2A 5' UTR creates an aberrant initiation codon and predisposes to  
936 melanoma. *Nature Genetics* **21**, 128–132 (1999).
- 937 83. Walker, G. J. *et al.* Virtually 100% of melanoma cell lines harbor alterations at the DNA level within CDKN2A,  
938 CDKN2B, or one of their downstream targets. *Genes, Chromosomes and Cancer* **22**, 157–163 (1998).
- 939 84. Sporn, M. & Liby, K. NRF2 and cancer: the good, the bad and the importance of context. *Nature reviews.*  
940 *Cancer* **12**, (2012).
- 941 85. Li, L. *et al.* SQSTM1 Is a Pathogenic Target of 5q Copy Number Gains in Kidney Cancer. *Cancer Cell* **24**, 738–  
942 750 (2013).
- 943 86. Huang, H. *et al.* Downregulation of Keap1 contributes to poor prognosis and Axitinib resistance of renal cell  
944 carcinoma via upregulation of Nrf2 expression. *Int J Mol Med* (2019) doi:10.3892/ijmm.2019.4134.
- 945 87. Ji, S., Xiong, Y., Zhao, X., Liu, Y. & Yu, L. Q. Effect of the Nrf2-ARE signaling pathway on biological  
946 characteristics and sensitivity to sunitinib in renal cell carcinoma. *Oncology Letters* **17**, 5175–5186 (2019).
- 947 88. Romero, R. *et al.* Keap1 mutation renders lung adenocarcinomas dependent on Slc33a1. *Nature Cancer* **1**,  
948 589–602 (2020).
- 949 89. Yang, W. *et al.* Immunogenic neoantigens derived from gene fusions stimulate T cell responses. *Nature*  
950 *Medicine* **25**, 767–775 (2019).
- 951 90. Braun, D. A. *et al.* Beyond conventional immune-checkpoint inhibition — novel immunotherapies for renal  
952 cell carcinoma. *Nat Rev Clin Oncol* **18**, 199–214 (2021).
- 953 91. Jansen, C. S. *et al.* An intra-tumoral niche maintains and differentiates stem-like CD8 T cells. *Nature* **576**,  
954 465–470 (2019).
- 955 92. Pignon, J.-C. *et al.* irRECIST for the Evaluation of Candidate Biomarkers of Response to Nivolumab in  
956 Metastatic Clear Cell Renal Cell Carcinoma: Analysis of a Phase II Prospective Clinical Trial. *Clin Cancer Res*  
957 **25**, 2174–2184 (2019).

- 958 93. Press Release. Bristol Myers Squibb Announces RELATIVITY-047, a Trial Evaluating Anti-LAG-3 Antibody  
959 Relatlimab and Opdivo (nivolumab) in Patients with Previously Untreated Metastatic or Unresectable  
960 Melanoma, Meets Primary Endpoint of Progression-Free Survival.
- 961 94. Best, S. A. *et al.* Synergy between the KEAP1/NRF2 and PI3K Pathways Drives Non-Small-Cell Lung Cancer  
962 with an Altered Immune Microenvironment. *Cell Metabolism* **27**, 935-943.e4 (2018).
- 963 95. Zhong, M. *et al.* Translocation renal cell carcinomas in adults: a single-institution experience. *Am J Surg*  
964 *Pathol* **36**, 654–662 (2012).
- 965 96. Heng, D. Y. C. *et al.* External validation and comparison with other models of the International Metastatic  
966 Renal-Cell Carcinoma Database Consortium prognostic model: a population-based study. *Lancet Oncol* **14**,  
967 141–148 (2013).
- 968 97. Zehir, A. *et al.* Mutational landscape of metastatic cancer revealed from prospective clinical sequencing of  
969 10,000 patients. *Nature Medicine* **23**, 703–713 (2017).
- 970 98. Campbell, P. J. *et al.* Pan-cancer analysis of whole genomes. *Nature* **578**, 82–93 (2020).
- 971 99. Malouf, G. G. *et al.* Next-Generation Sequencing of Translocation Renal Cell Carcinoma Reveals Novel RNA  
972 Splicing Partners and Frequent Mutations of Chromatin-Remodeling Genes. *Clin Cancer Res* **20**, 4129–4140  
973 (2014).
- 974 100. Garcia, E. P. *et al.* Validation of OncoPanel: A Targeted Next-Generation Sequencing Assay for the  
975 Detection of Somatic Variants in Cancer. *Arch Pathol Lab Med* **141**, 751–758 (2017).
- 976 101. Ellrott, K. *et al.* Scalable Open Science Approach for Mutation Calling of Tumor Exomes Using Multiple  
977 Genomic Pipelines. *cells* **6**, 271-281.e7 (2018).
- 978 102. Ramos, A. H. *et al.* Oncotator: cancer variant annotation tool. *Hum Mutat* **36**, E2423-2429 (2015).
- 979 103. 1000 Genomes Project Consortium *et al.* A global reference for human genetic variation. *Nature* **526**,  
980 68–74 (2015).

- 981 104. Vokes, N. I. *et al.* Harmonization of Tumor Mutational Burden Quantification and Association With  
982 Response to Immune Checkpoint Blockade in Non–Small-Cell Lung Cancer. *JCO Precision Oncology* 1–12  
983 (2019) doi:10.1200/PO.19.00171.
- 984 105. Taylor, A. M. *et al.* Genomic and Functional Approaches to Understanding Cancer Aneuploidy. *Cancer*  
985 *Cell* **33**, 676–689.e3 (2018).
- 986 106. Turajlic, S. *et al.* Tracking Cancer Evolution Reveals Constrained Routes to Metastases: TRACERx Renal.  
987 *Cell* **173**, 581–594.e12 (2018).
- 988 107. Bakouny, Z. *et al.* Integrative molecular characterization of sarcomatoid and rhabdoid renal cell  
989 carcinoma. *Nature Communications* **12**, 808 (2021).
- 990 108. Harrer, M., Cuijpers, P., Furukawa, T. & Ebert, D. Doing meta-analysis in R: A hands-on guide. *PROTECT*  
991 *Lab Erlangen* (2019).
- 992 109. Efthimiou, O. Practical guide to the meta-analysis of rare events. *Evid Based Ment Health* **21**, 72–76  
993 (2018).
- 994 110. Veroniki, A. A. *et al.* Methods to estimate the between-study variance and its uncertainty in meta-  
995 analysis. *Res Synth Methods* **7**, 55–79 (2016).
- 996 111. Sondka, Z. *et al.* The COSMIC Cancer Gene Census: describing genetic dysfunction across all human  
997 cancers. *Nature Reviews Cancer* **18**, 696–705 (2018).
- 998 112. Crowdis, J., He, M. X., Reardon, B. & Van Allen, E. M. CoMut: visualizing integrated molecular  
999 information with comutation plots. *Bioinformatics* **36**, 4348–4349 (2020).
- 1000 113. Krzywinski, M. *et al.* Circos: An information aesthetic for comparative genomics. *Genome Res.* **19**, 1639–  
1001 1645 (2009).
- 1002 114. Xie, Z. *et al.* Gene Set Knowledge Discovery with Enrichr. *Current Protocols* **1**, e90 (2021).
- 1003 115. Marchler-Bauer, A. *et al.* CDD: NCBI’s conserved domain database. *Nucleic Acids Res* **43**, D222–226  
1004 (2015).

- 1005 116. Lancaster, A. K., Nutter-Upham, A., Lindquist, S. & King, O. D. PLAAC: a web and command-line  
1006 application to identify proteins with prion-like amino acid composition. *Bioinformatics* **30**, 2501–2502  
1007 (2014).
- 1008 117. Liu, W. *et al.* IBS: an illustrator for the presentation and visualization of biological sequences.  
1009 *Bioinformatics* **31**, 3359–3361 (2015).
- 1010 118. Dobin, A. *et al.* STAR: ultrafast universal RNA-seq aligner. *Bioinformatics* **29**, 15–21 (2013).
- 1011 119. Li, B. & Dewey, C. N. RSEM: accurate transcript quantification from RNA-Seq data with or without a  
1012 reference genome. *BMC Bioinformatics* **12**, 323 (2011).
- 1013 120. Ritchie, M. E. *et al.* limma powers differential expression analyses for RNA-sequencing and microarray  
1014 studies. *Nucleic Acids Res* **43**, e47 (2015).
- 1015 121. Gu, Z., Eils, R. & Schlesner, M. Complex heatmaps reveal patterns and correlations in multidimensional  
1016 genomic data. *Bioinformatics* **32**, 2847–2849 (2016).
- 1017 122. Conway, J. R., Lex, A. & Gehlenborg, N. UpSetR: an R package for the visualization of intersecting sets  
1018 and their properties. *Bioinformatics* **33**, 2938–2940 (2017).
- 1019 123. Liberzon, A. *et al.* The Molecular Signatures Database (MSigDB) hallmark gene set collection. *Cell Syst* **1**,  
1020 417–425 (2015).
- 1021 124. Takahashi, N. *et al.* 3D Culture Models with CRISPR Screens Reveal Hyperactive NRF2 as a Prerequisite  
1022 for Spheroid Formation via Regulation of Proliferation and Ferroptosis. *Molecular Cell* **80**, 828-844.e6  
1023 (2020).
- 1024 125. McFarland, J. M. *et al.* Improved estimation of cancer dependencies from large-scale RNAi screens using  
1025 model-based normalization and data integration. *Nat Commun* **9**, 4610 (2018).
- 1026 126. Meyers, R. M. *et al.* Computational correction of copy number effect improves specificity of CRISPR-Cas9  
1027 essentiality screens in cancer cells. *Nat Genet* **49**, 1779–1784 (2017).
- 1028 127. Dempster, J. M. *et al.* Extracting Biological Insights from the Project Achilles Genome-Scale CRISPR  
1029 Screens in Cancer Cell Lines. *bioRxiv* 720243 (2019) doi:10.1101/720243.

- 1030 128. Seashore-Ludlow, B. *et al.* Harnessing Connectivity in a Large-Scale Small-Molecule Sensitivity Dataset.  
1031 *Cancer Discov* **5**, 1210–1223 (2015).
- 1032 129. Viswanathan, S. R. *et al.* Genome-scale analysis identifies paralog lethality as a vulnerability of  
1033 chromosome 1p loss in cancer. *Nat Genet* **50**, 937–943 (2018).
- 1034 130. Heng, D. Y. C. *et al.* Prognostic factors for overall survival in patients with metastatic renal cell carcinoma  
1035 treated with vascular endothelial growth factor-targeted agents: results from a large, multicenter study. *J*  
1036 *Clin Oncol* **27**, 5794–5799 (2009).
- 1037 131. Liu, J. *et al.* An Integrated TCGA Pan-Cancer Clinical Data Resource to Drive High-Quality Survival  
1038 Outcome Analytics. *Cell* **173**, 400-416.e11 (2018).
- 1039 132. Eisenhauer, E. A. *et al.* New response evaluation criteria in solid tumours: Revised RECIST guideline  
1040 (version 1.1). *European Journal of Cancer* **45**, 228–247 (2009).
- 1041 133. Rees, M. G. *et al.* Correlating chemical sensitivity and basal gene expression reveals mechanism of  
1042 action. *Nat Chem Biol* **12**, 109–116 (2016).
- 1043 134. Wang, X. *et al.* Malignant melanotic Xp11 neoplasms exhibit a clinicopathological spectrum and gene  
1044 expression profiling akin to alveolar soft part sarcoma: a proposal for reclassification. *The Journal of*  
1045 *Pathology* **n/a**,.
- 1046
- 1047



1048 **FIGURES**

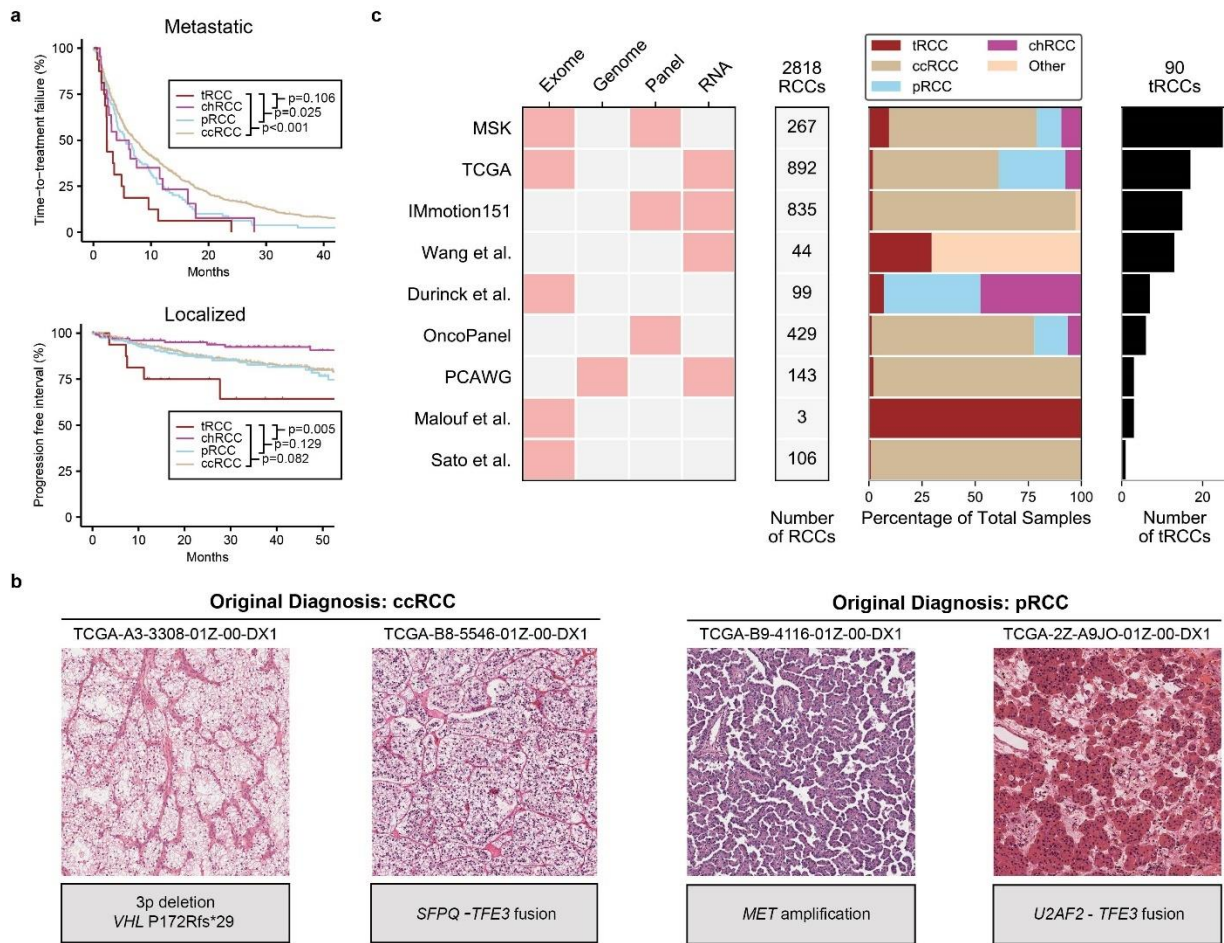

1049

1050 **Fig. 1 | Identification of tRCC cases in multiple clinical and molecular datasets.** **a**, *Top*, Kaplan-Meier curves  
 1051 for time-to-treatment failure in metastatic ccRCC, pRCC, chrRCC, or tRCC (Harvard cohort). *Bottom*, Kaplan-  
 1052 Meier curves for progression-free interval for localized ccRCC, pRCC, chrRCC, or tRCC (TCGA cohort). P-values  
 1053 were calculated by pairwise log-rank test. **b**, Representative H&E micrographs (x10) of cases originally included  
 1054 in the TCGA ccRCC or pRCC sequencing cohorts. The right case in each pair was subsequently found to have a  
 1055 *TFE3* gene fusion on RNA-Seq. **c**, Aggregation of tRCC cases from across 9 independent NGS datasets. The  
 1056 data type(s) analyzed are indicated for each dataset. tRCC cases were identified based on the presence of a  
 1057 fusion involving an *MIT/TFE* family member (see **Methods**). The number and proportion of tRCC samples as  
 1058 well as number of total RCC samples is indicated for each dataset.

1059

1060



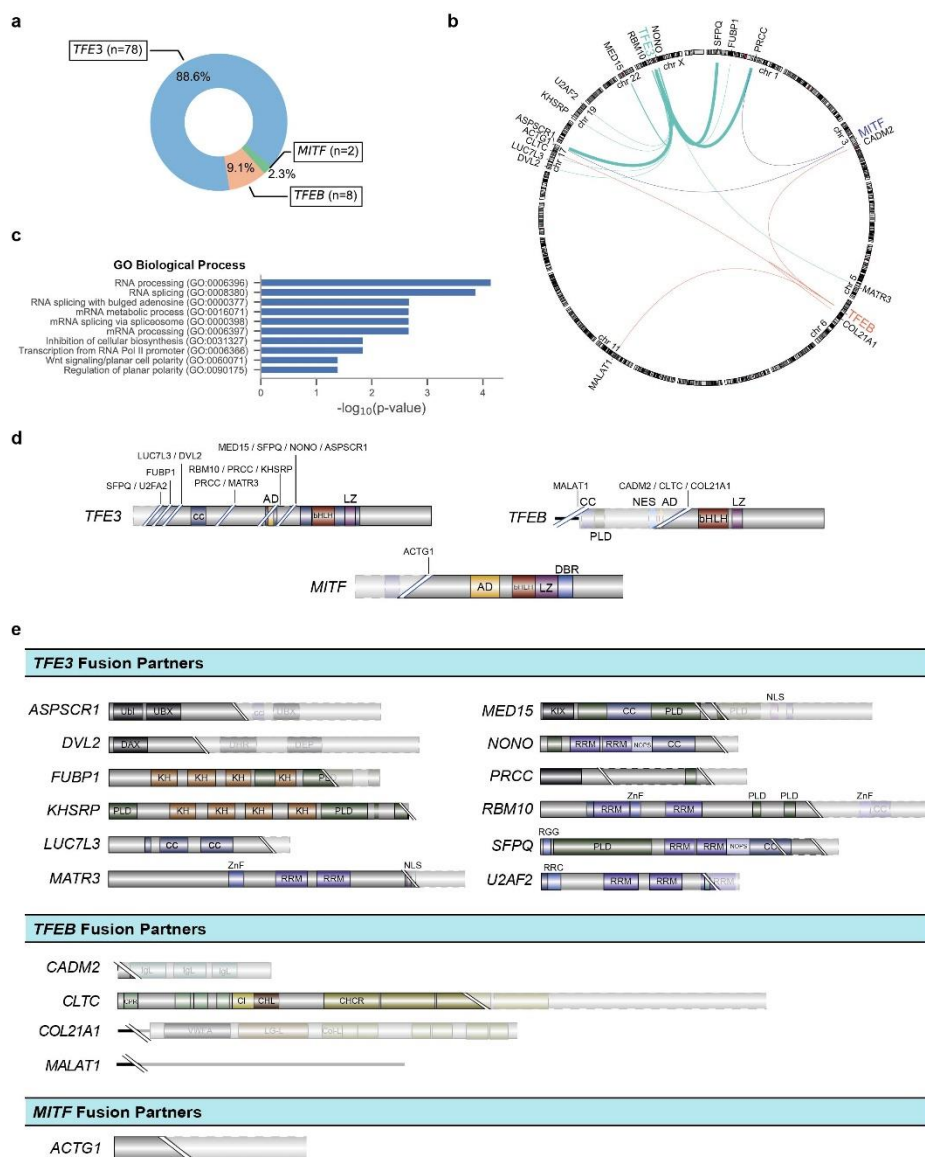

1073

1074 **Fig. 3 | Structure of Mit/TFE fusions in tRCC.** **a**, Number and percentage of tRCC cases displaying gene  
 1075 fusions involving *TFE3*, *TFEB*, or *MITF* across all datasets analyzed. **b**, Genomic location of *Mit/TFE*  
 1076 fusion partners. Stroke thickness is proportional to the number of times a given gene was observed to be an *Mit/TFE*  
 1077 fusion partner across all datasets analyzed. **c**, Gene ontology terms (GO Biological Process) enriched amongst  
 1078 *Mit/TFE* fusion partners. **d**, Breakpoints observed within *TFE3*, *TFEB*, or *MITF* across all samples analyzed.  
 1079 Solid portion represents the portion of the *Mit/TFE* gene retained within the oncogenic fusion product. Fusion  
 1080 partner genes observed to join at a given breakpoint are listed. Functional domains within each *Mit/TFE* gene are  
 1081 indicated (legend in **Supplementary Table 2**). **e**, Breakpoints observed within *Mit/TFE* partner genes. Solid  
 1082 portion represents the portion of each partner gene retained within the oncogenic fusion product. Genes are  
 1083 grouped by whether they were observed to fuse with *TFE3* (top), *TFEB* (middle), or *MITF* (bottom). Functional  
 1084 domains within each *Mit/TFE* partner gene are indicated (legend in **Supplementary Table 2**).



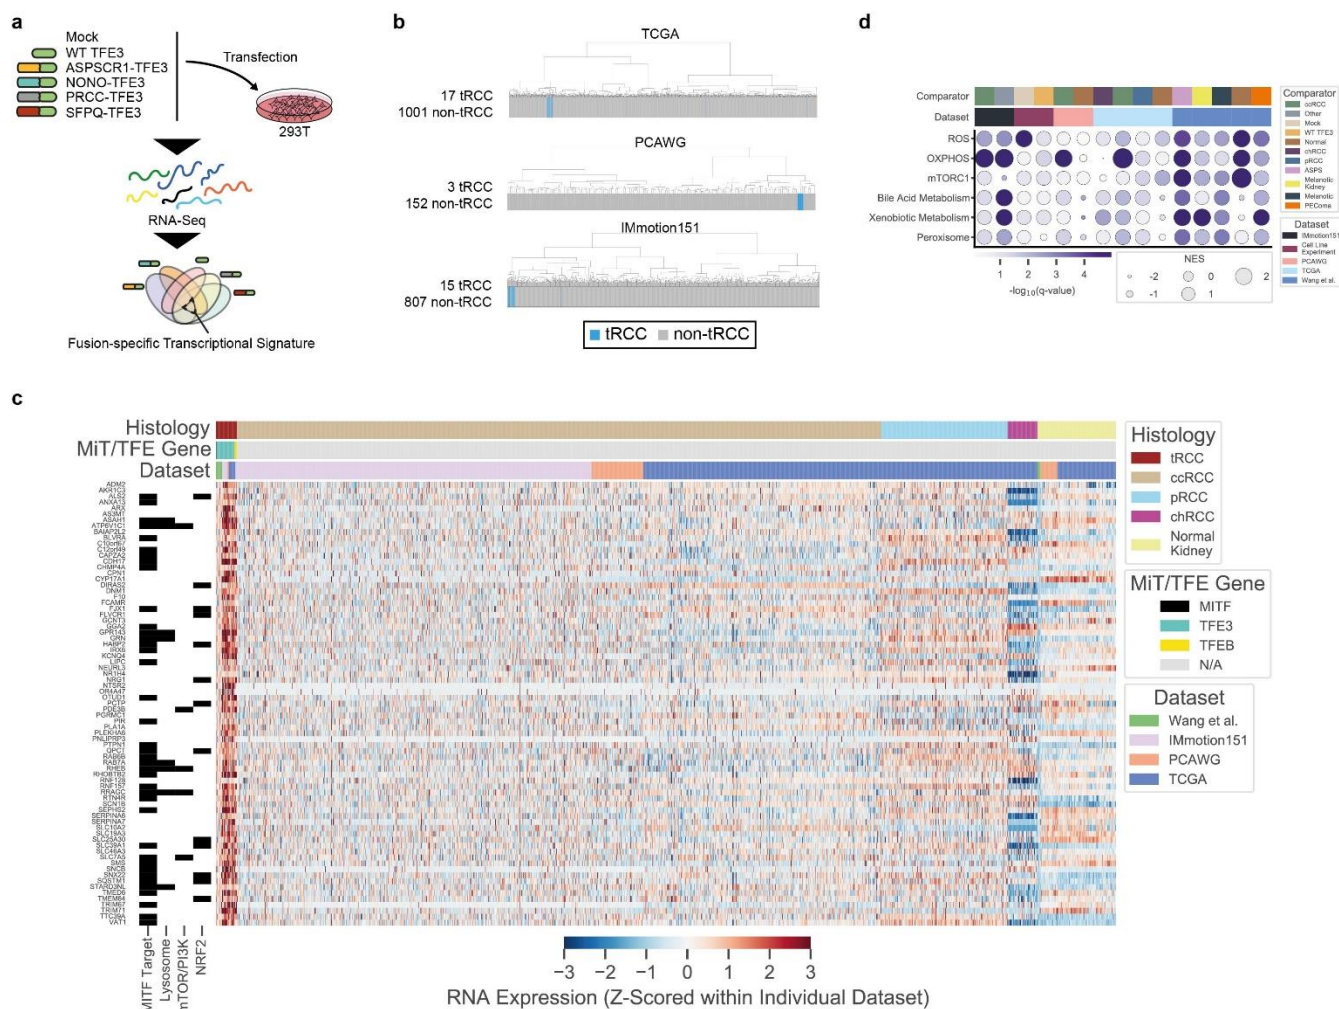

1085

1086 **Fig. 4 | Distinctive transcriptional features of tRCC.** **a**, Schematic of *in vitro* experiment used to derive *TFE3*-  
 1087 fusion-specific transcriptional signature. **b**, Transcriptome sequencing data from three independent datasets  
 1088 (TCGA, PCAWG, IMmotion151) were subjected to unsupervised hierarchical clustering using the fusion-specific  
 1089 signature derived in (a). Blue bars indicate *MiT/TFE*-fusion-positive cases within each dataset. Gray bars indicate  
 1090 other RCC histologic subtypes or normal kidney. **c**, Heatmap of genes overexpressed in tRCC as compared with  
 1091 other RCC subtypes or normal kidney, across all datasets (see **Fig.S4**). Membership of genes in key pathways  
 1092 related to tRCC pathogenesis is indicated in the track at left. **d**, Gene set enrichment analysis showing top  
 1093 enriched Hallmark pathways in tRCC samples versus comparators across all datasets analyzed. Dataset and  
 1094 pairwise comparison across which the GSEA was performed is indicated in the track at the top of each column.  
 1095 Dot size is proportional to normalized enrichment score (NES) in tRCC versus comparator; dot color -  
 1096  $\log_{10}(q\text{-value})$  for the enrichment.

1097

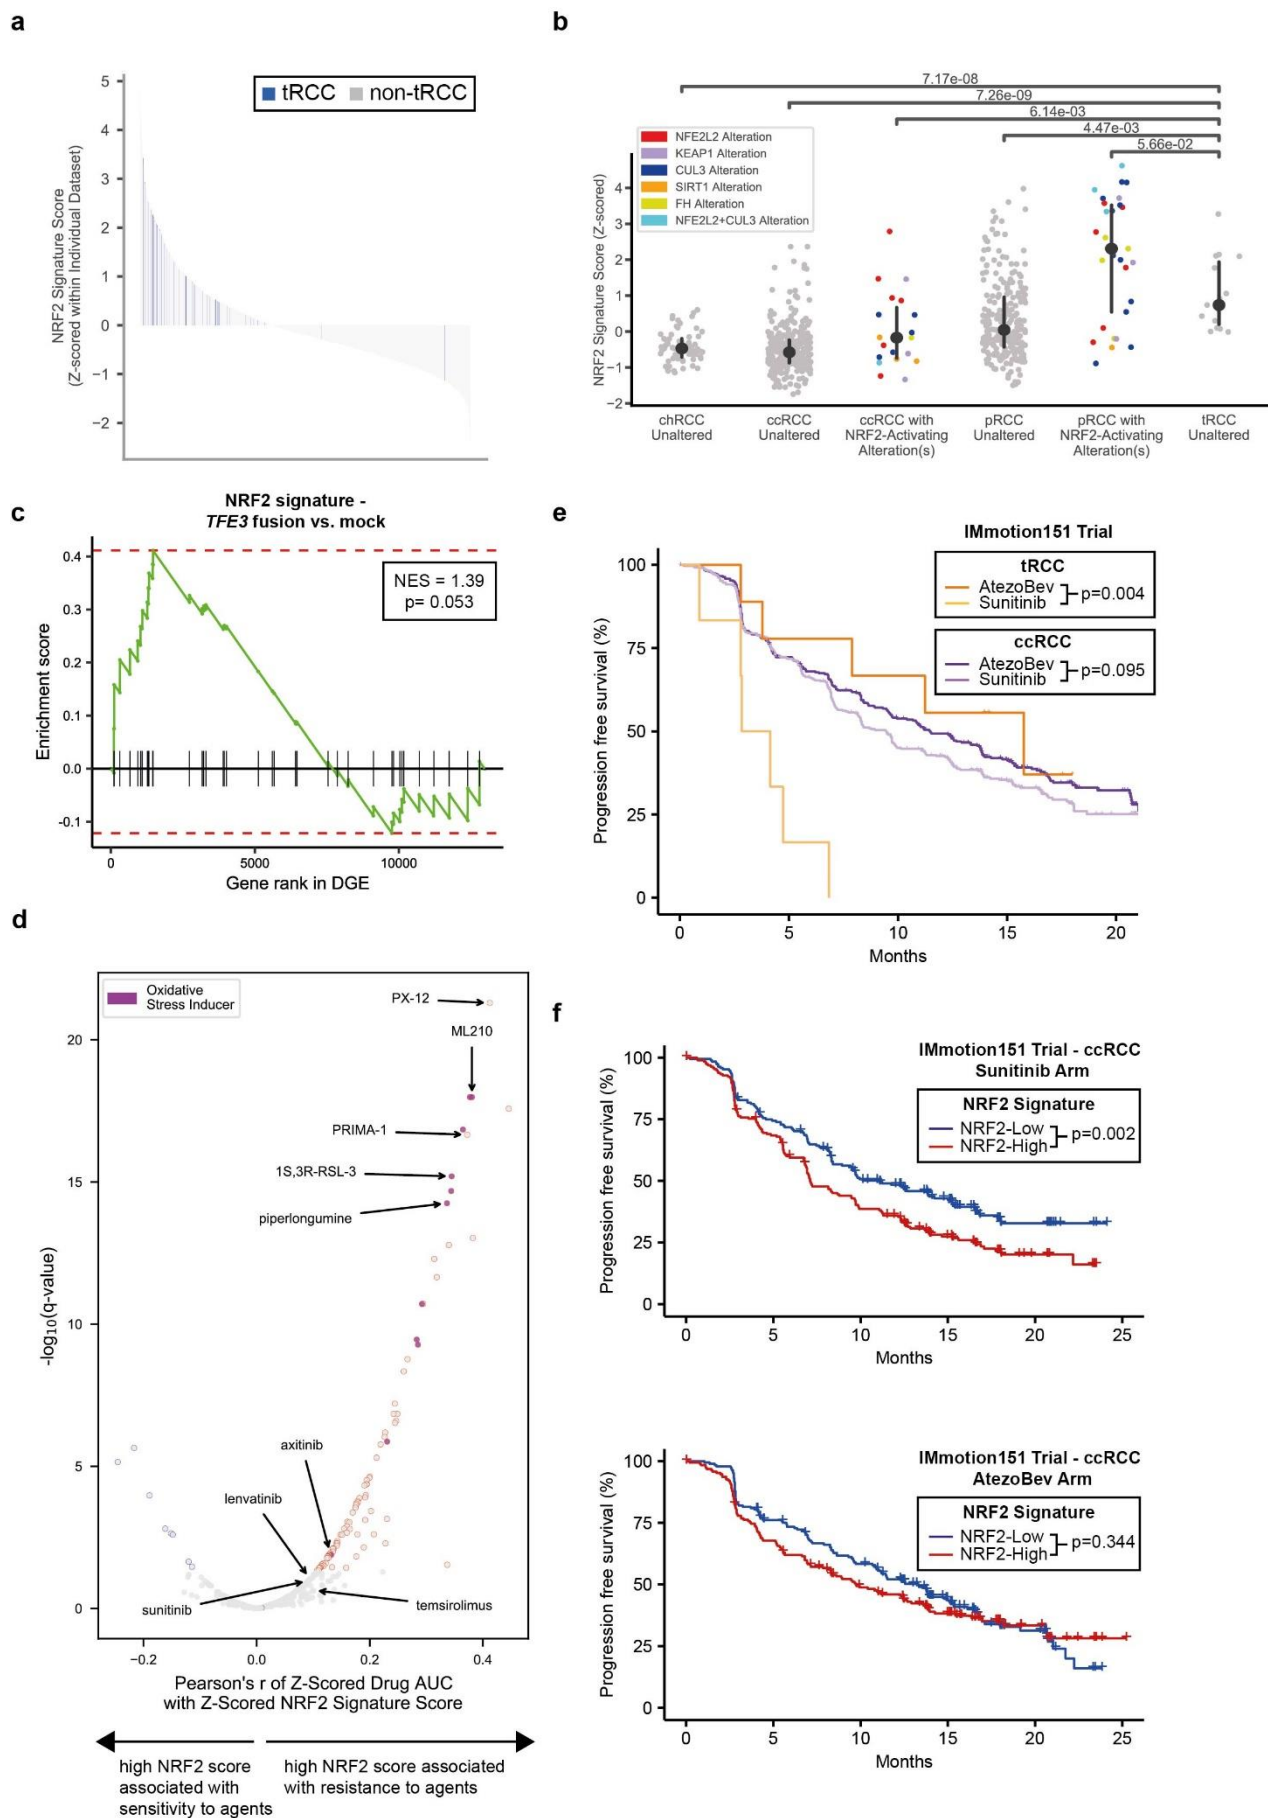

1099 **Fig. 5 | tRCC displays activated NRF2 pathway signaling and a relative resistance to targeted therapies. a,**  
1100 Waterfall plot showing NRF2 signature score for all RCC samples across all datasets analyzed. tRCC samples  
1101 are depicted in blue (n=46); other samples (ccRCC, pRCC, chRCC, normal kidney, or other tumors) are shown in  
1102 gray (n=1999). **b,** NRF2 signature score for TCGA RCC samples of the indicated histologies. For each histology,  
1103 samples with somatic alterations in the NRF2 pathway are shown separately. No chRCC or tRCC samples  
1104 displayed somatic alterations in the NRF2 pathway. **c,** Gene set enrichment analysis showing enrichment of  
1105 NRF2 gene signature in 293T cells expressing *TFE3* fusions versus mock (untransfected) control condition. **d,**  
1106 Volcano plot showing correlation of NRF2 signature score with drug sensitivity in the Broad Institute Cancer  
1107 Therapeutics Response Portal dataset<sup>133</sup>. A high NRF2 signature score is significantly associated with resistance  
1108 to the agents shown in red. Agents annotated to act through the induction of oxidative stress or ferroptosis are  
1109 colored in purple. Selected targeted agents used in the treatment of kidney cancer are labeled. **e,** Progression-  
1110 free survival curves for tRCC (dark and light orange) or ccRCC (dark and light purple) patients treated with either  
1111 atezolizumab and bevacizumab (AtezoBev) or sunitinib in the randomized Phase III IMmotion151 trial. **f,**  
1112 Progression-free survival curves for ccRCC patients with high (red) or low (blue) NRF2 signature score treated  
1113 with either sunitinib (top) atezolizumab + bevacizumab (bottom) on the IMmotion151 trial. For **e-f,** NRF2 signature  
1114 score was dichotomized at the median in each arm.

1115

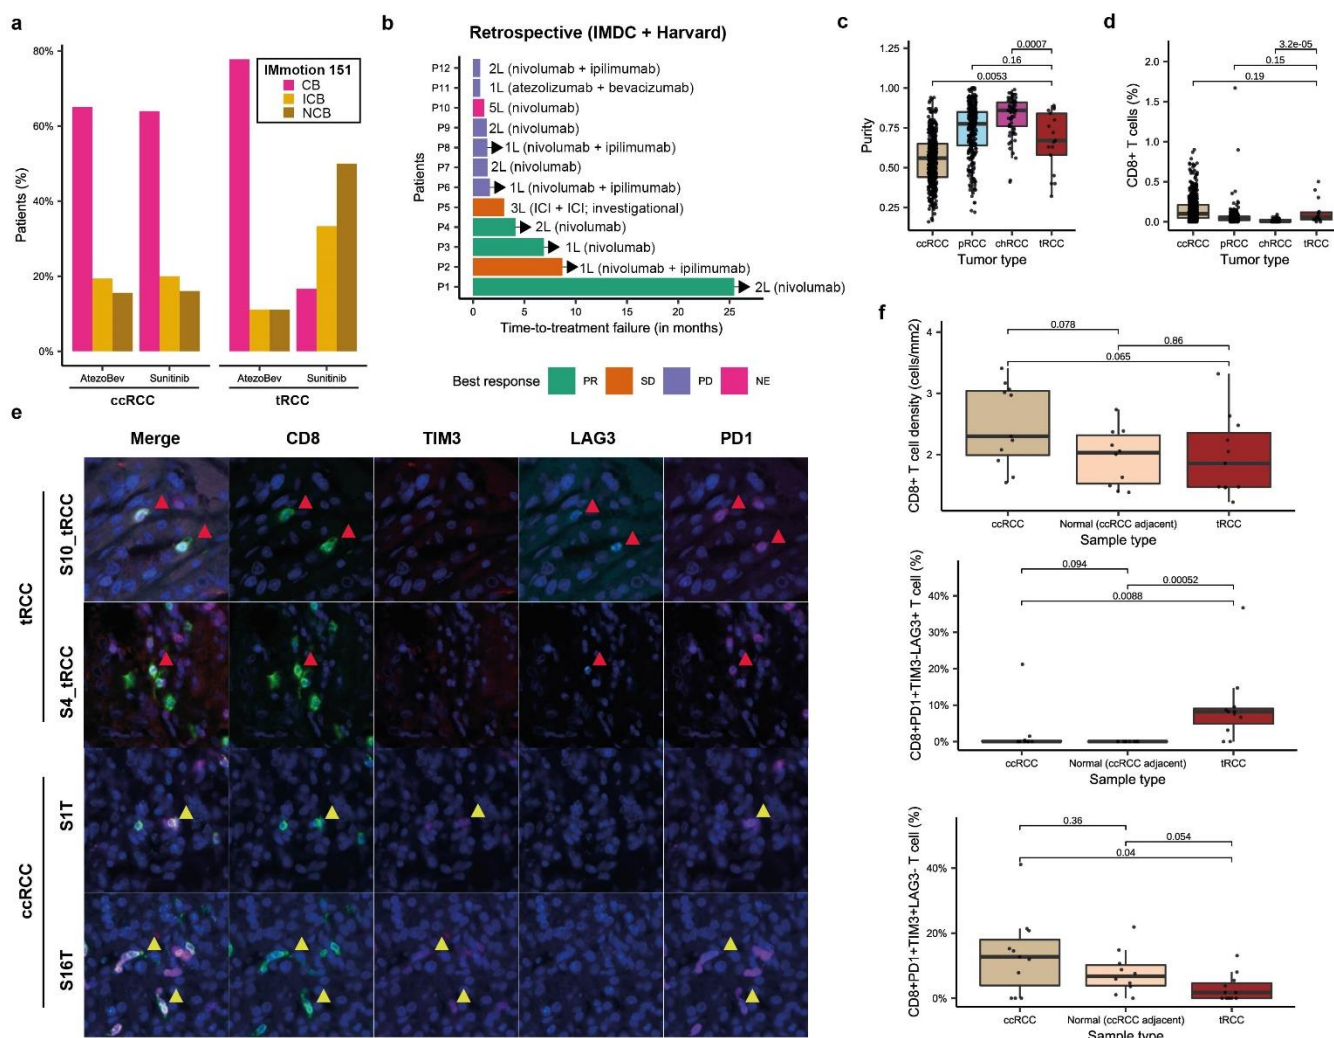

1116

1117 **Fig. 6 | Immunogenomic features of tRCC associated with responses to immune checkpoint inhibition. a,**  
 1118 Percentage of tRCC patients showing clinical benefit (CB), intermediate clinical benefit (ICB), or no clinical benefit  
 1119 (NCB) to either AtezoBev or sunitinib on the IMmotion151 trial. **b,** Swimmer plot showing response types and  
 1120 response times to immune checkpoint inhibitor-based regimens in tRCC patients in the combined IMDC and  
 1121 Harvard retrospective cohort. Line (L) in which ICI was received as well as specific ICI regimen is indicated to the  
 1122 right of each patient. **c,** Sample purity in tRCC, ccRCC, chRCC, and pRCC in the TCGA cohort. **d,** CD8<sup>+</sup> T cell  
 1123 infiltration imputed from gene expression (CIBERSORTx) in tRCC, ccRCC, chRCC, and pRCC in the TCGA  
 1124 cohort. **e,** Multiparametric immunofluorescence for CD8, TIM3, LAG3, and PD1 in representative tRCC cases (top  
 1125 two rows) and ccRCC cases (bottom two rows). Red arrows indicate CD8<sup>+</sup>PD1<sup>+</sup>LAG3<sup>+</sup>TIM3<sup>+</sup> tumor-infiltrating T  
 1126 cells in tRCC cases. Yellow arrows indicate CD8<sup>+</sup>PD1<sup>+</sup>LAG3<sup>+</sup>TIM3<sup>+</sup> tumor-infiltrating T cells in ccRCC cases. **f,**  
 1127 Quantification of CD8<sup>+</sup> T-cell density (top), percentage of CD8<sup>+</sup>PD1<sup>+</sup>TIM3<sup>+</sup>LAG3<sup>+</sup> T cells (middle), and percentage  
 1128 of CD8<sup>+</sup>PD1<sup>+</sup>TIM3<sup>+</sup>LAG3<sup>+</sup> T cells (bottom) in tRCC (n = 11), ccRCC (n = 11), and adjacent normal tissue (from  
 1129 ccRCC cases, n = 10).

1130



1131 SUPPLEMENTARY FIGURES

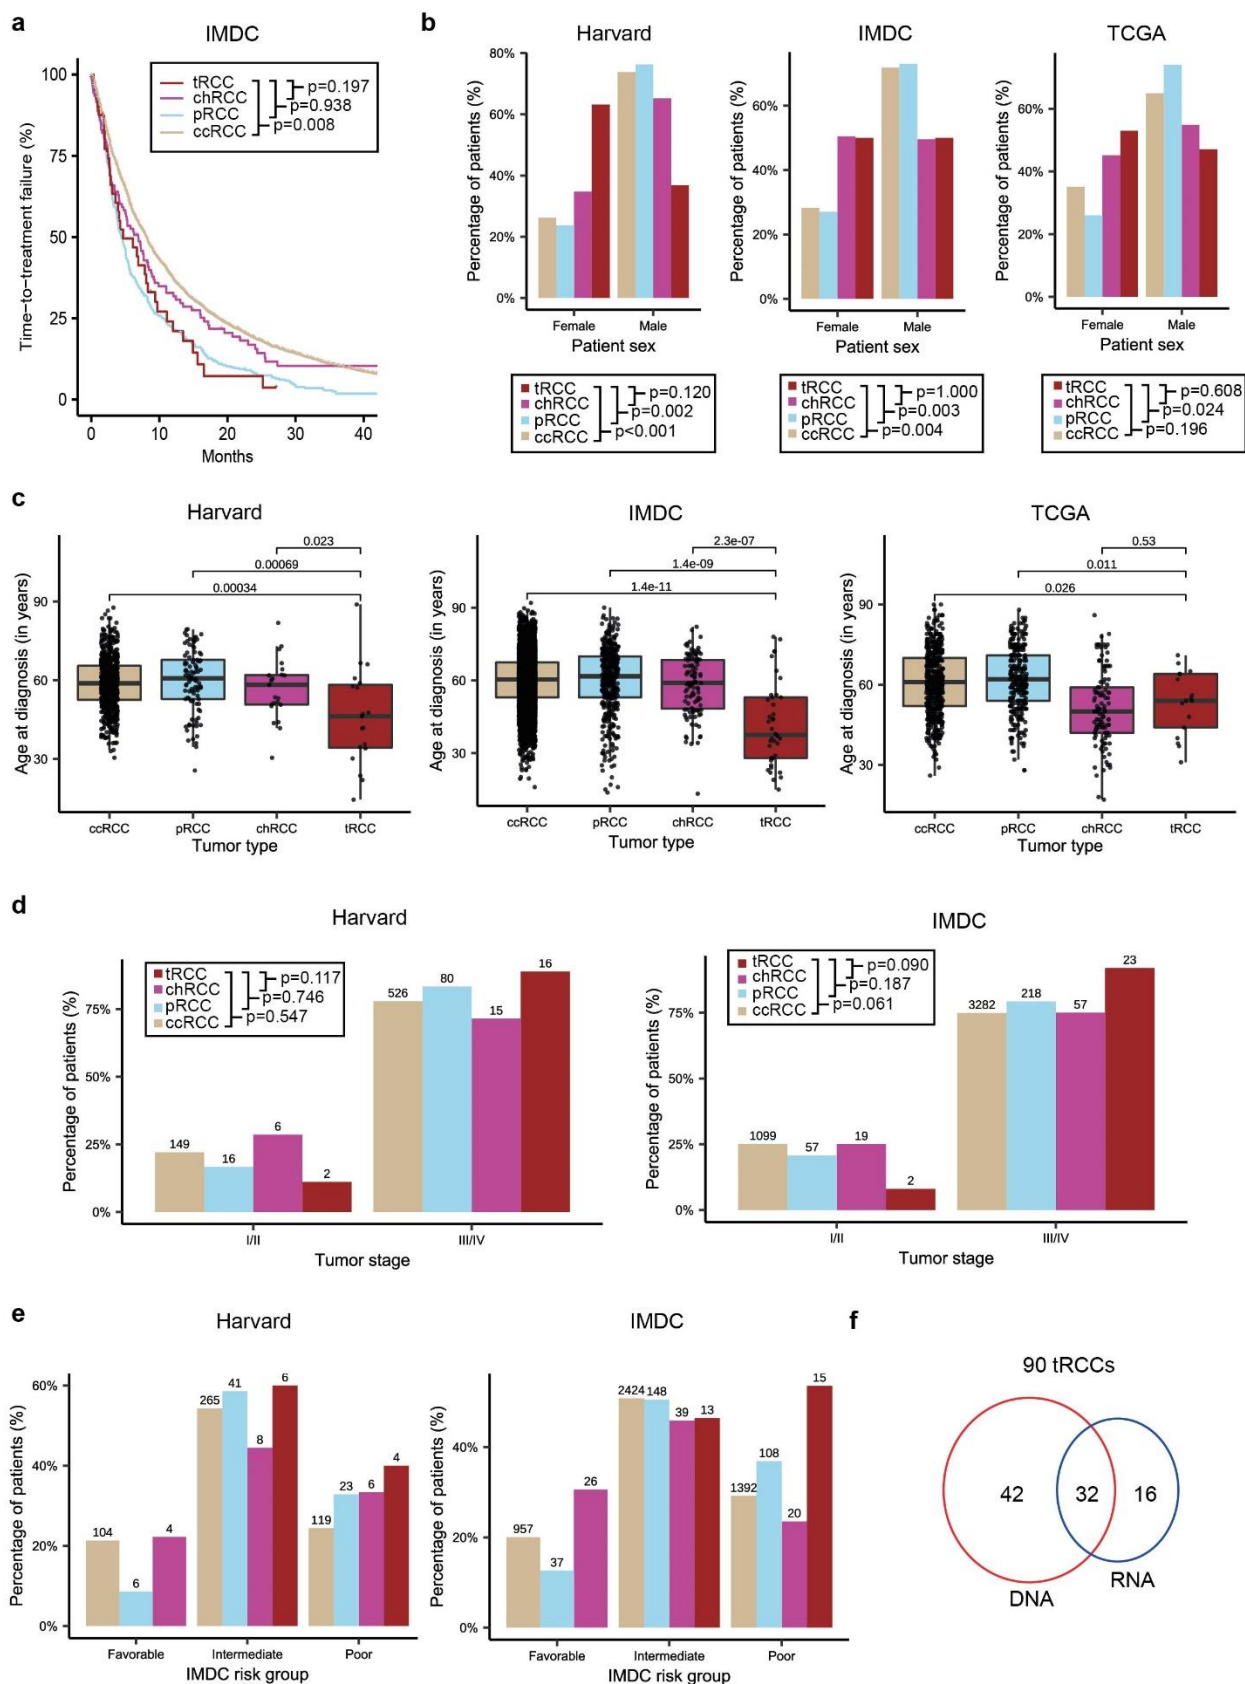

1133 **Fig. S1 | Clinical features of tRCC.** **a**, Kaplan-Meier curves for time-to treatment-failure in metastatic ccRCC,  
1134 pRCC, chrRCC, and tRCC from patients in the IMDC cohort. **b**, Proportion of male and female ccRCC, pRCC,  
1135 chrRCC, and tRCC cases in the Harvard, IMDC, and TCGA cohorts. **c**, Age distribution of tRCC, ccRCC,  
1136 chrRCC, and pRCC cases in the Harvard, IMDC, and TCGA datasets. **d** Distribution stage at diagnosis  
1137 among ccRCC, pRCC, chrRCC, and tRCC patients in the Harvard and IMDC cohorts. **e**, Distribution of IMDC  
1138 risk group at start of first-line of systemic therapy among ccRCC, pRCC, chrRCC, and tRCC patients in the  
1139 Harvard and IMDC cohorts. **f**, Number of tRCC samples with DNA sequencing (WGS, WES, or Panel  
1140 sequencing), RNA sequencing, or both data types, available for analysis across all NGS data sets.

1141

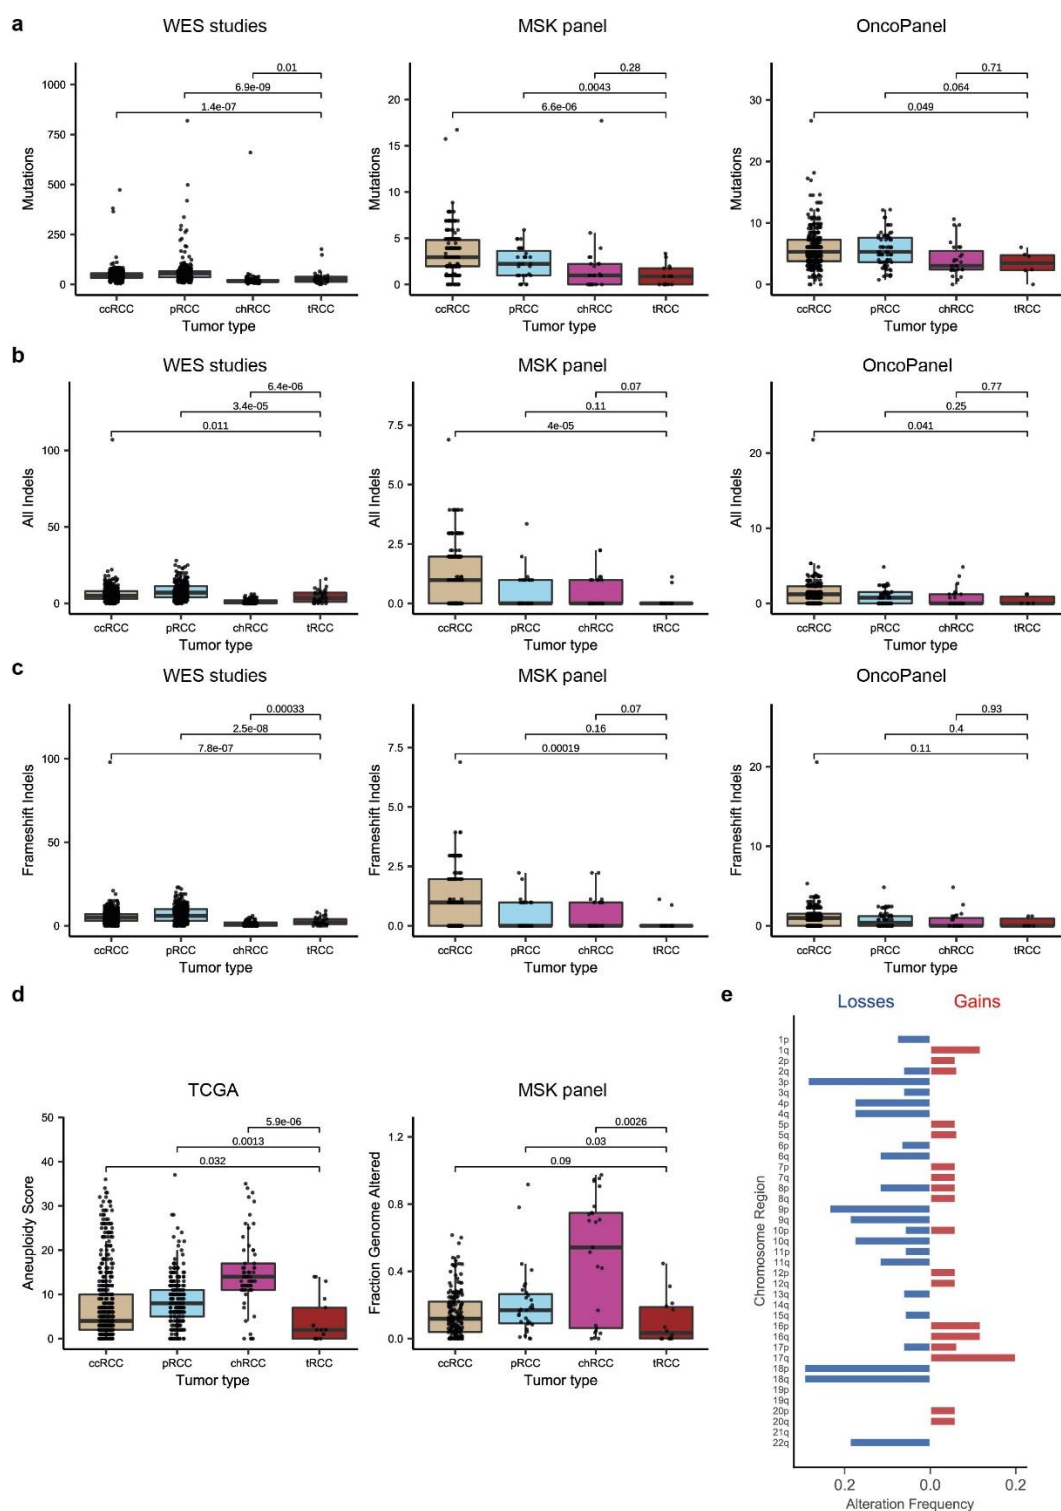

1142

1143 **Fig. S2 | Genomic features of tRCC as compared with other RCC subtypes.** **a**, Number of mutations per  
 1144 sample in tRCC versus other RCC histologies in the TCGA, MSK, and OncoPanel cohorts. **b**, Number of  
 1145 indels per sample in tRCC versus other RCC histologies in the TCGA, MSK, and OncoPanel cohorts. **c**,  
 1146 Number of frameshift indels per sample in tRCC versus other RCC histologies in the TCGA, MSK, and  
 1147 OncoPanel cohorts. In **a-c**, for the OncoPanel and MSK cohorts, the numbers of mutations and indels were  
 1148 normalized to the bait set of each version of each panel (**Methods**) **d**, *Left*, Aneuploidy score<sup>34</sup> in tRCC  
 1149 versus other RCC histologies in the TCGA cohort. *Right*, Fraction of genome altered in tRCC versus other

1150 RCC histologies in the MSK cohort. **e**, Frequency of arm-level copy number alterations among tRCC  
1151 samples in the TCGA cohort<sup>34</sup>.  
1152

**a**

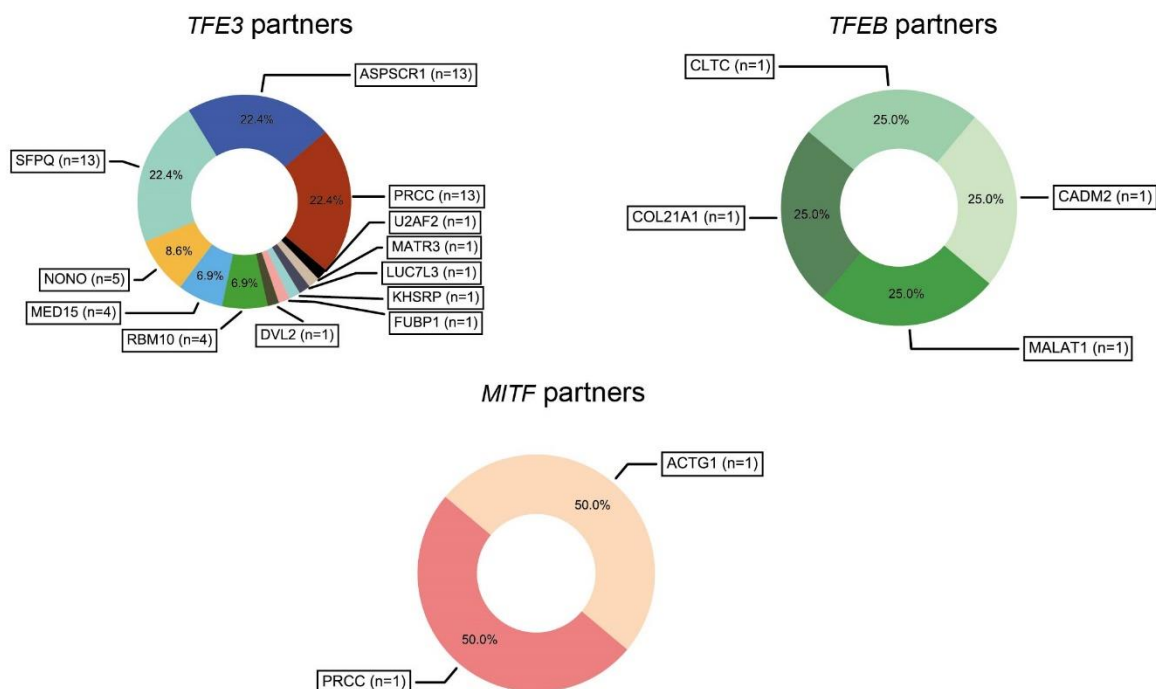

**b**

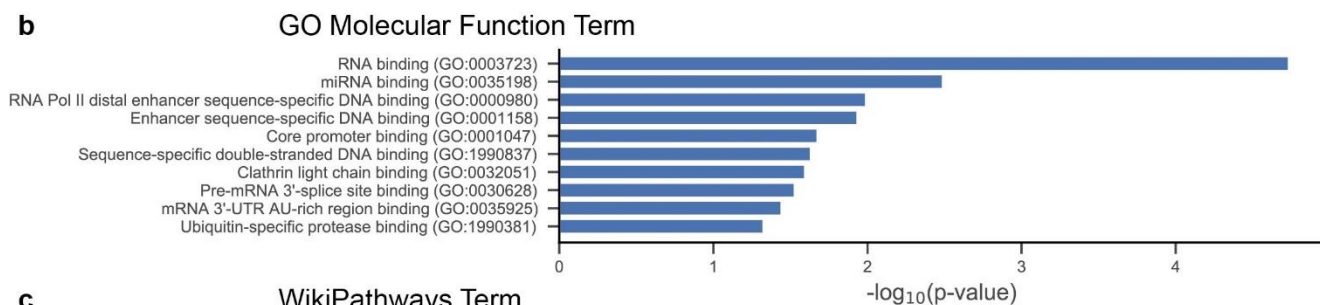

**c**

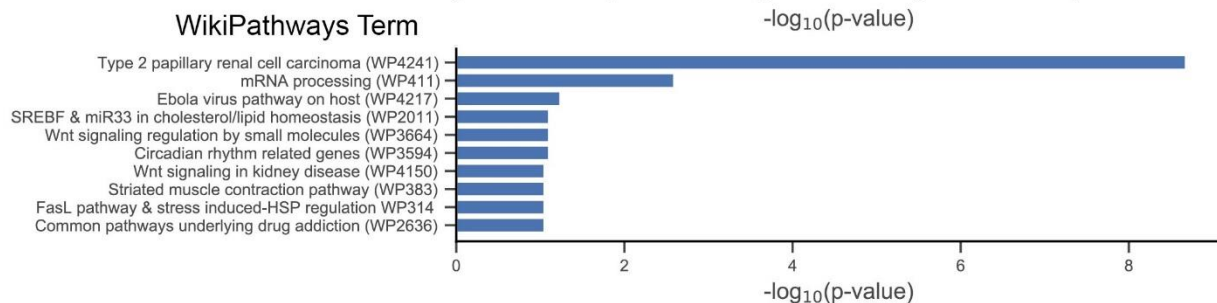

1153

1154

1155

1156

1157

**Fig. S3 | Characterization of *Mit/TFE* fusion partners.** **a**, Frequency of various partner genes observed to fuse with *TFE3*, *TFEB*, or *MITF* across all datasets. **b-c**, Terms enriched amongst *Mit/TFE* fusion partner genes using either the GO Molecular Function (**b**) or Wikipathways (**c**) databases.

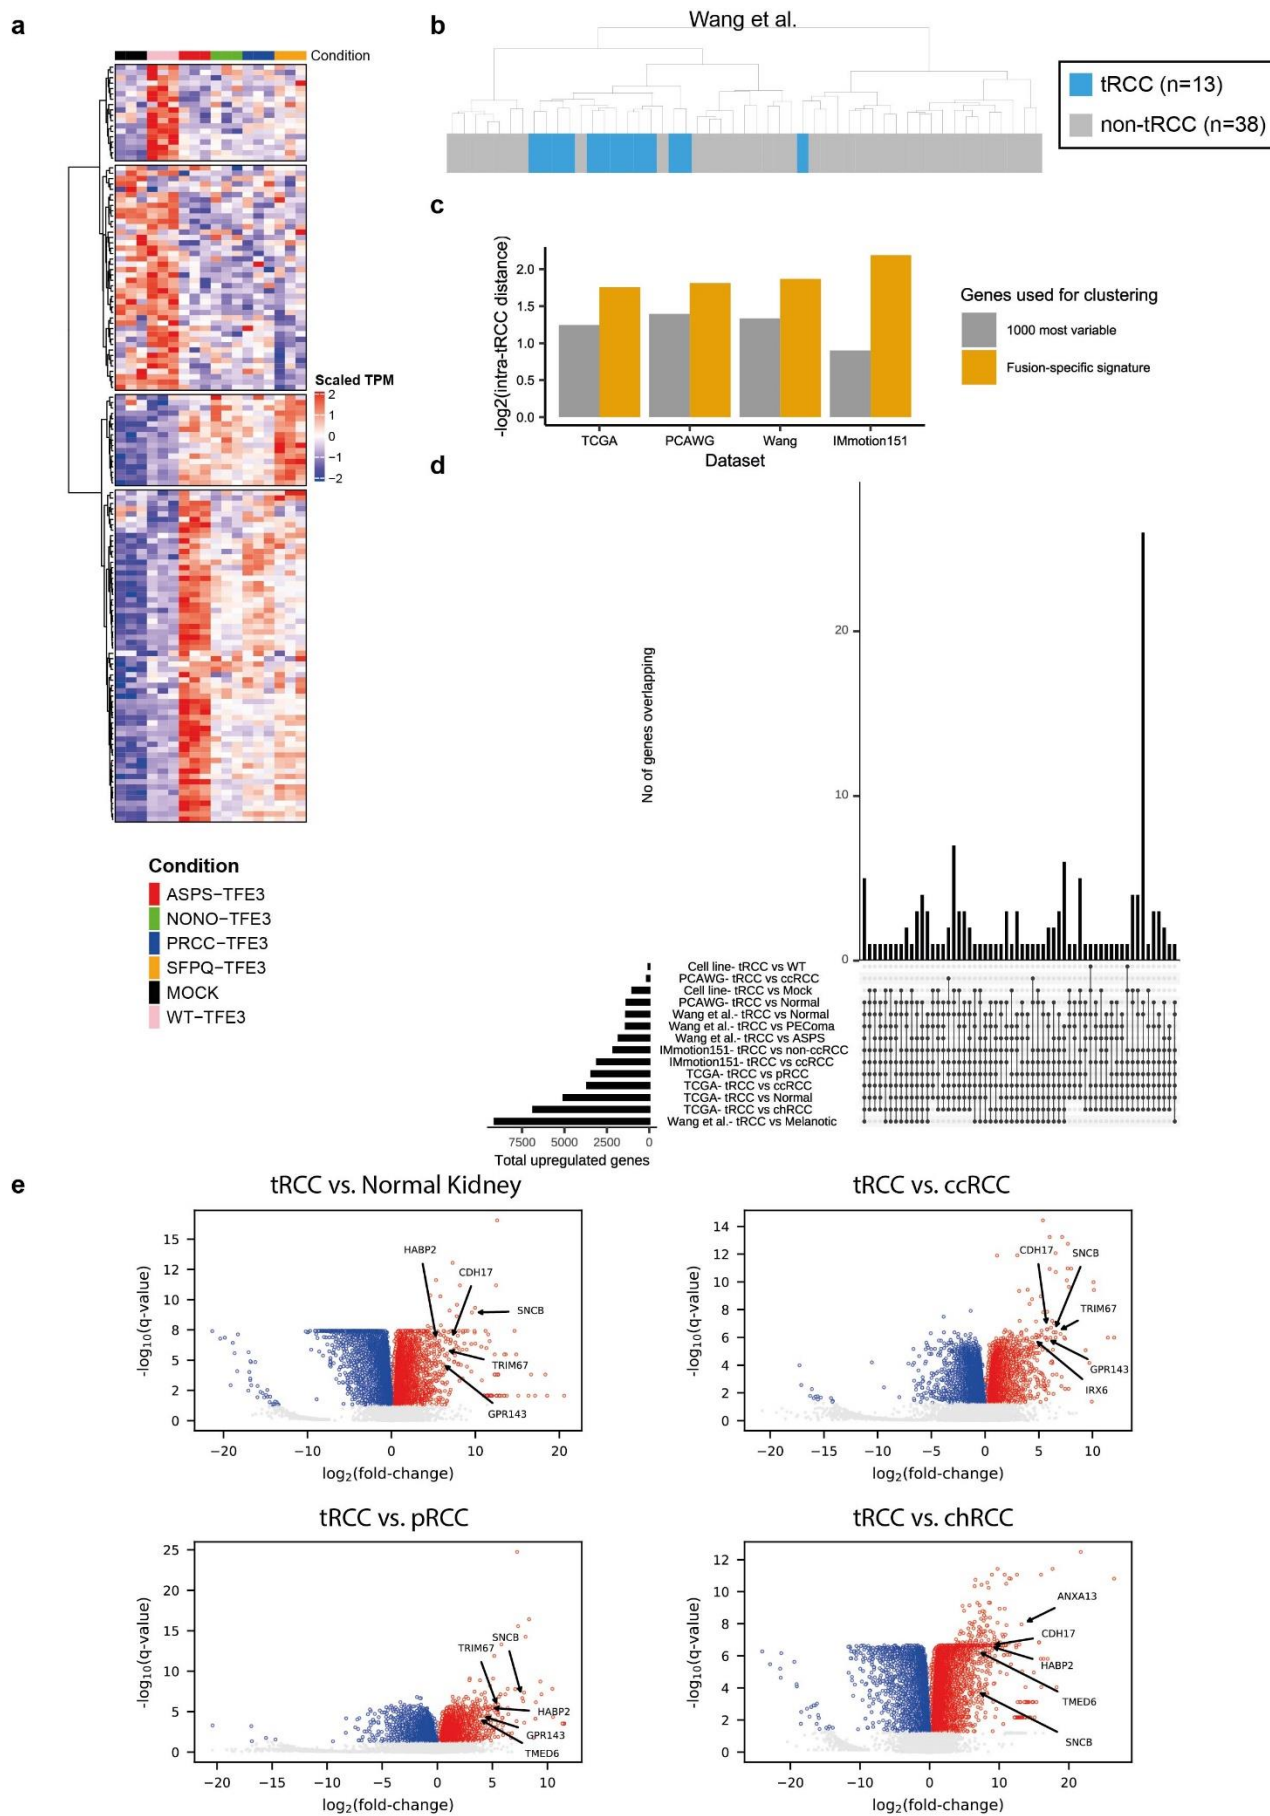

1159 **Fig. S4 | Transcriptional features of tRCC.** **a**, Expression of genes included in the *in vitro*-derived *TFE3*  
1160 fusion-specific gene signature. **b**, Hierarchical clustering of RNA-Seq data<sup>134</sup> based on fusion-specific gene  
1161 signature. **c**, Quality of clustering (based on  $-\log_2(\text{intra-tRCC distance})$ ) in the TCGA, PCAWG, Wang et al.,  
1162 or IMmotion151 datasets using either 1000 most variable genes (grey) or the fusion-specific gene signature  
1163 (orange). **d**, Upset plot showing overlap of upregulated ( $q < 0.05$ ) genes in tRCC versus other sample types  
1164 in each of the datasets analyzed. **e**, Volcano plots showing differentially expressed genes in tRCC samples  
1165 versus normal kidney, ccRCC, pRCC, and chrRCC in the TCGA cohort. Labels indicate selected genes that  
1166 emerged as commonly upregulated in tRCC versus other sample types (**Figures 4c and S4c**) across all  
1167 datasets analyzed.

1168



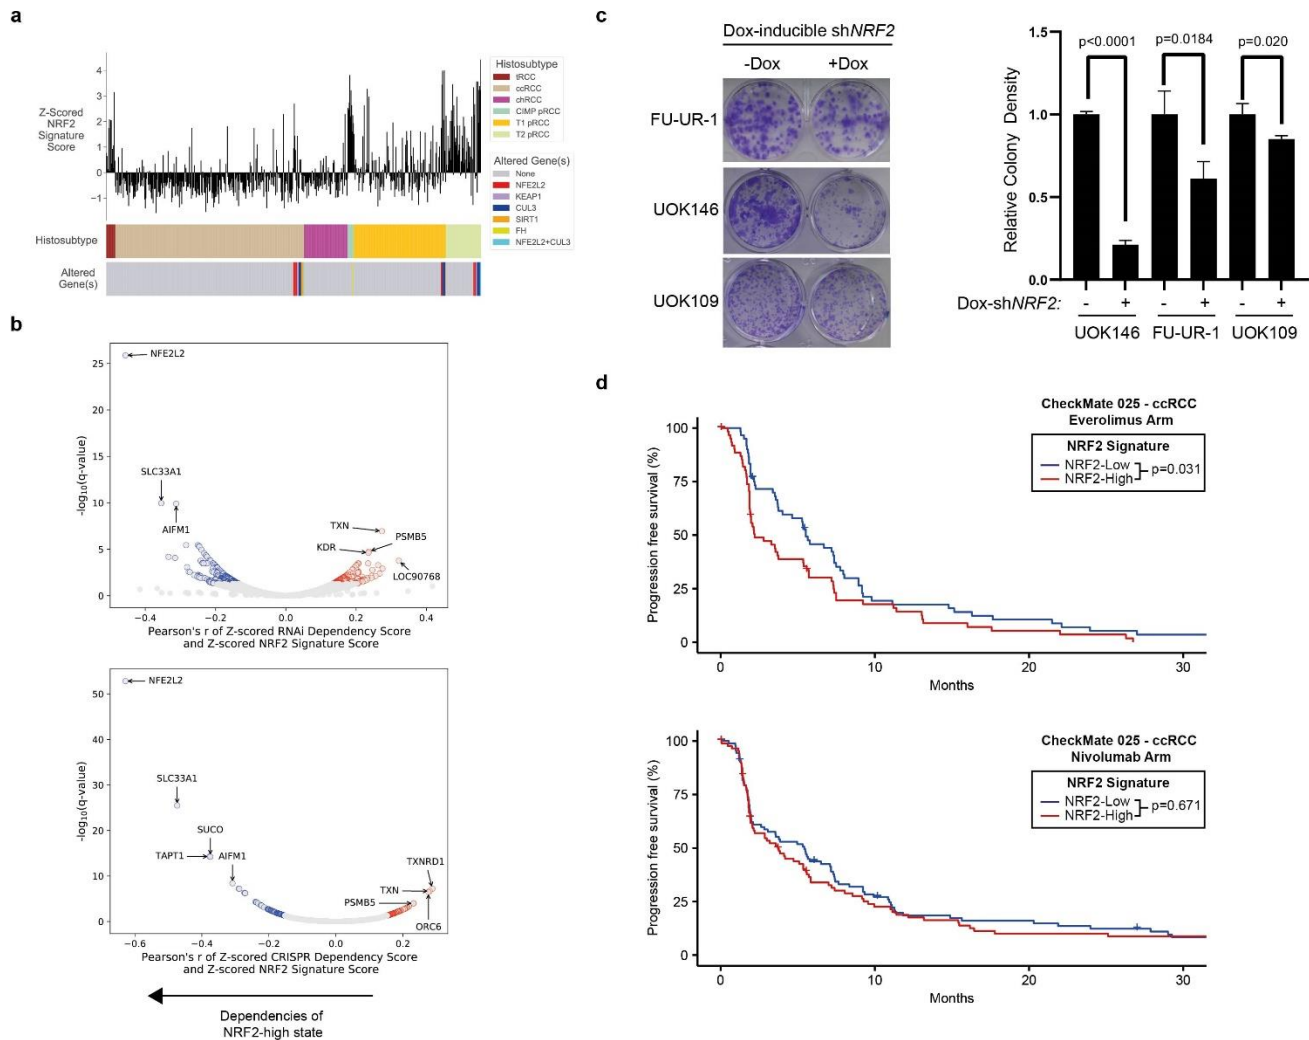

1169

1170 **Fig. S5 | Activation of the NRF2 pathway in tRCC.** **a**, NRF2 signature score in tRCC samples compared  
 1171 with ccRCC, pRCC, or chrRCC samples from the TCGA effort. Papillary RCC subtypes are annotated as  
 1172 previously described<sup>26,27</sup>. Somatic alterations in the NRF2 pathway genes are indicated on the bottom track.  
 1173 **b**, Volcano plot displaying gene dependencies correlated to high NRF2 score in the DepMap RNAi (top) and  
 1174 CRISPR (bottom) datasets. **c**, Colony-forming assay in three tRCC cell lines (FU-UR1, UOK109, UOK146)  
 1175 transduced with a lentiviral doxycycline-inducible shRNA targeting *NRF2*. Quantification represents mean  
 1176 +/- s.d. for n=3 independent replicates. **d**, Progression-free survival curves for ccRCC patients with high (red) or  
 1177 low (blue) NRF2 signature score treated with either everolimus (top) or nivolumab (bottom) in the CheckMate  
 1178 cohort. NRF2 signature score was dichotomized at the median in each arm.

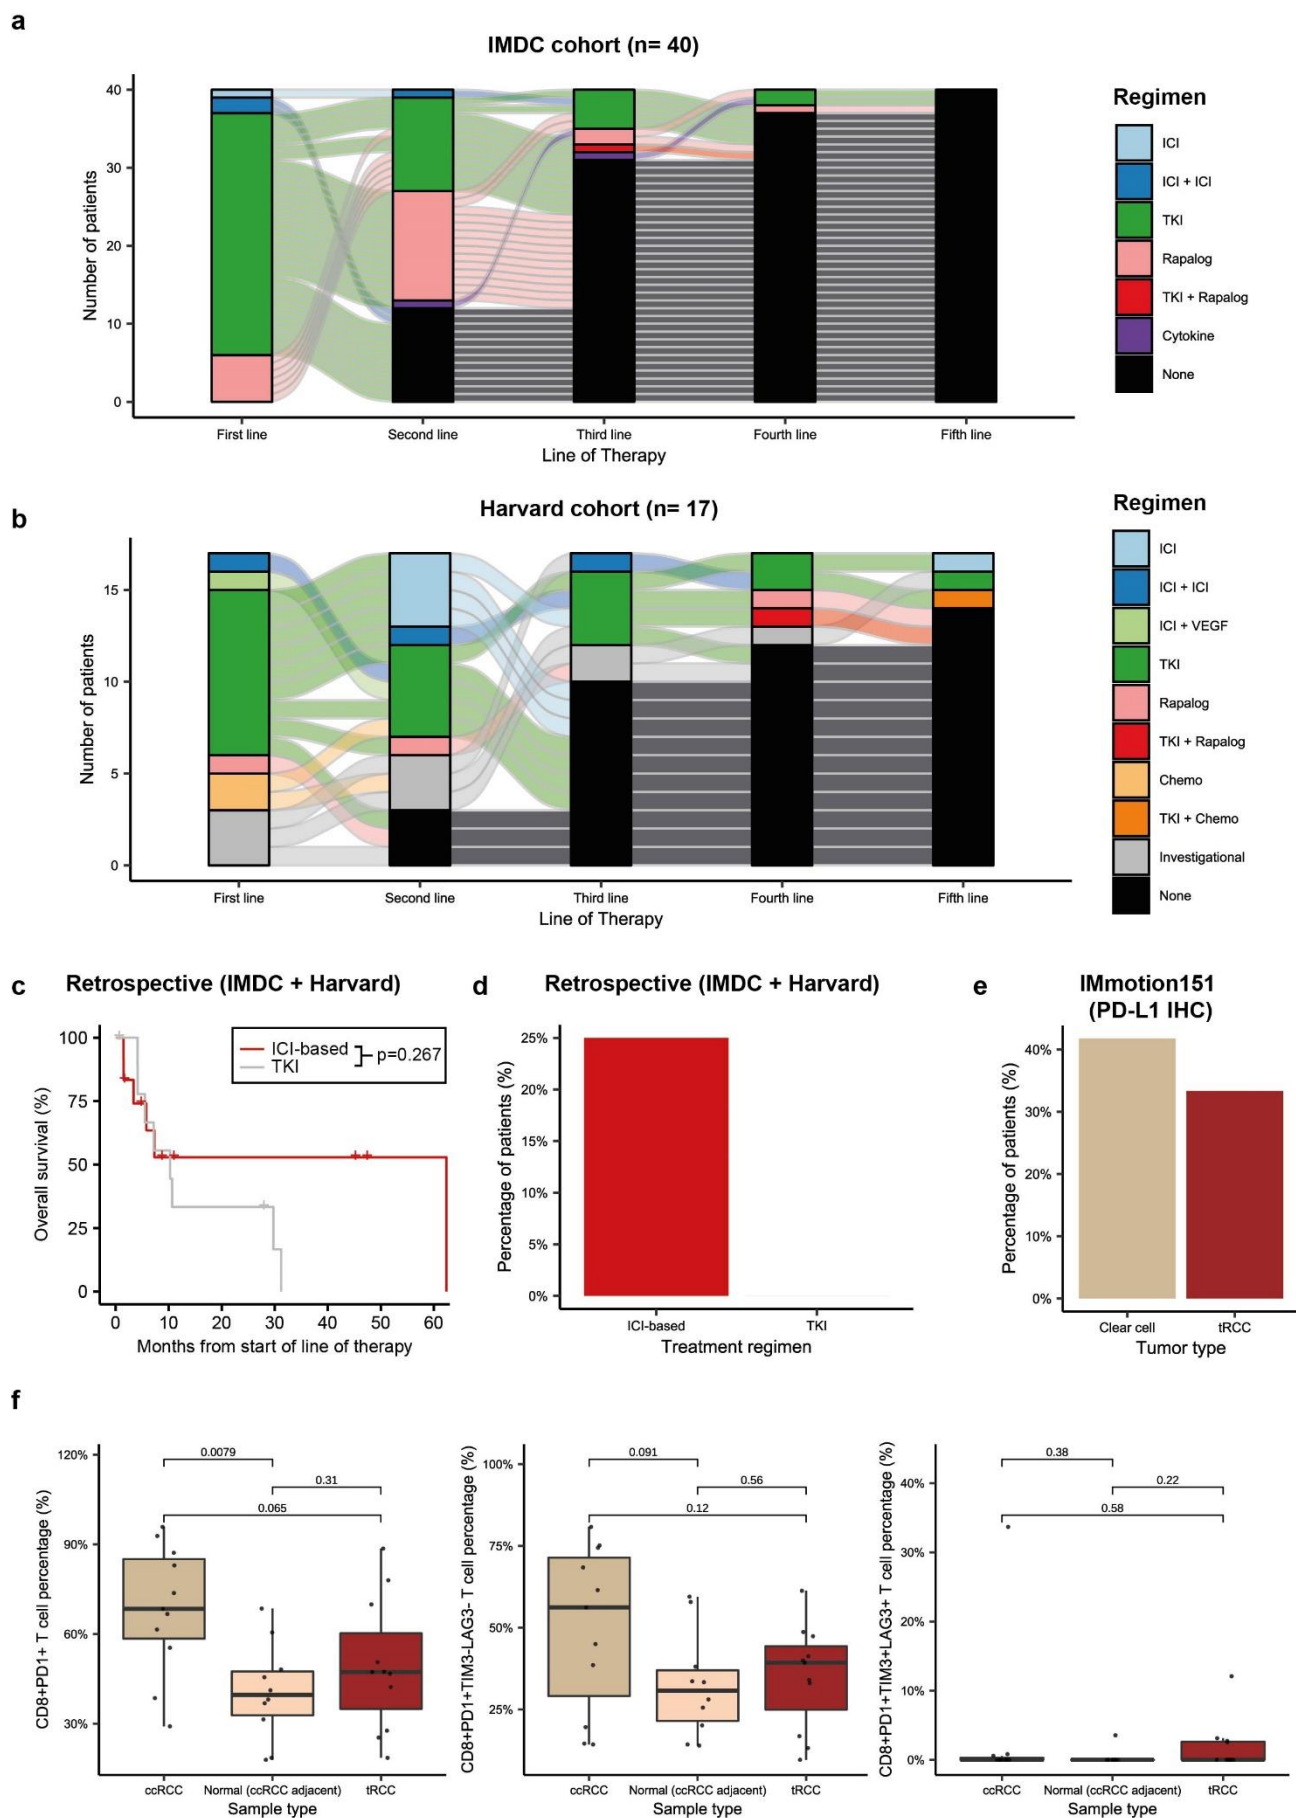

1180 **Fig. S6 | Immunogenomic features and treatment patterns in tRCC. a**, Sankey flow diagram showing  
1181 lines of systemic treatment received by patients with metastatic tRCC in the retrospective IMDC cohort  
1182 (n=40). **b**, Sankey flow diagram showing lines of systemic treatment received by patients with metastatic  
1183 tRCC in the retrospective Harvard cohort (n=17). **c**, Kaplan-Meier curves for overall survival in metastatic tRCC  
1184 patients who received ICI-based (n=12) or tyrosine kinase inhibitor (TKI, n=10) regimens in the combined Harvard  
1185 + IMDC retrospective cohort. **d**, Percentage of tRCC patients showing a response to either immune  
1186 checkpoint inhibitor (ICI-based) or tyrosine kinase inhibitor (sunitinib and pazopanib) in the combined IMDC  
1187 and Harvard retrospective cohorts. **e**, PD-L1 protein expression on infiltrating immune cells (PD-L1 $\geq$  1%) in  
1188 tRCC (n=15) and ccRCC (n=797) in the IMmotion151 cohort. **f**, Quantification of percentage of CD8<sup>+</sup>PD1<sup>+</sup> T-  
1189 cells (left), percentage of CD8<sup>+</sup>PD1<sup>+</sup>TIM3<sup>-</sup>LAG3<sup>-</sup> T cells (middle), and percentage of CD8<sup>+</sup>PD1<sup>+</sup>TIM3<sup>+</sup>LAG3<sup>+</sup> T  
1190 cells (right) in tRCC (n=11), ccRCC (n=11), and adjacent normal tissue (from ccRCC cases, n= 10) analyzed by  
1191 multiparametric immunofluorescence.

1192

1193 **SUPPLEMENTARY TABLE LEGENDS**

1194 **Supplementary Table 1:** List of samples in the NGS datasets included in the analysis.

1195 **Supplementary Table 2:** List and legend of functional domains used in the annotation of *MIT/TFE* and partners  
1196 genes in **Figures 3d-e**.

1197 **Supplementary Table 3:** RSEM expected counts (**Supplementary Table 3a**) and transcript-per-million (TPM;  
1198 **Supplementary Table 3b**) derived from the RNA-sequencing of the cell lines in the *in vitro* experiment  
1199 represented in **Figure 4a**.

1200 **Supplementary Table 4:** List of genes that are in the *TFE3*-fusion-specific transcriptional signature developed in  
1201 **Figure 4a**.

1202 **Supplementary Table 5:** Sample-level MAF (**Supplementary Table 5a**) and gene-level copy number  
1203 (**Supplementary Table 5b**) data for the OncoPanel cohort.

1204 **Supplementary Table 6:** Sample-level data for the multiparametric immunofluorescence cohort.

1205
